# Supplementary material for: Marine environmental DNA biomonitoring reveals seasonal patterns in biodiversity and identifies ecosystem responses to anomalous climatic events
Source: PubMed Central journal article supplement (PMC6368286; doi:10.1371/journal.pgen.1007943), 2019-02-08
Supplement: pgen.1007943.s001.pdf [file pgen.1007943.s001.pdf]

**Table S1:** The metabarcoding PCR assays used in this study

| PCR assay | Primer set used                          | Primary target taxa | Gene        | Primer sequence                                               | Amplicon length (bp) | Reference                                   | Assay Ta (°C) |
|-----------|------------------------------------------|---------------------|-------------|---------------------------------------------------------------|----------------------|---------------------------------------------|---------------|
| Cnidaria  | Cnidaria_F<br>Cnidaria_R                 | Cnidarians          | COI         | 5' CATGATHTTYTCWTDGTMATGCC 3'<br>5' GTYCAWCCWGTWCCWRCYCC 3'   | ~145                 | This study                                  | 52            |
| Copepod 1 | Triconia_F<br>Triconia_R                 | Copepods            | COI         | 5' CAGGVTCTTAYTWGGRGATG 3'<br>5' AAAATCTATATTATTARBCGRGG 3'   | ~131                 | This study                                  | 49            |
| Copepod 2 | Lucicutia_F<br>Lucicutia_R               | Copepods            | COI         | 5' CCHGAYATAGCTTYCCHCG 3'<br>5' GAAAAAATGCAAAATCTACDGATC 3'   | ~134                 | This study                                  | 52            |
| Copepod 3 | Acartia_F<br>Acartia_R                   | Copepods            | COI         | 5' GGRGAYGATCARRYTATAAYGT 3'<br>5' TTYATWCGWGGAAAHGCYATRTC 3' | ~103                 | This study                                  | 50            |
| Crustacea | Crust16S_F (short)<br>Crust16S_R (short) | Crustaceans         | 16S<br>rRNA | 5' GGGACGATAAGACCCTATA 3'<br>5' ATTACGCTGTTATCCCTAAAG 3'      | ~170                 | Berry et al. [1]                            | 51            |
| Mollusca  | Limacina_F<br>Limacina_R                 | Molluscs            | COI         | 5' TAATTGGNGVTTTGGRAAYTG 3'<br>5' GTTCAHCCTRAYCCTRCNCC 3'     | ~118                 | This study                                  | 52            |
| Fish      | 16s2R (degenerate)<br>Fish16sF/D         | Actinopterygii      | 16S<br>rRNA | 5' CGCTGTTATCCCTADRGTAACT 3'<br>5' GACCCTATGGAGCTTAGAC 3'     | ~200                 | F- Deagle et al. [2]<br>R- Berry et al. [1] | 54            |
| Universal | 18s_1F<br>18s_400R                       | Universal           | 18S<br>rRNA | 5' GCCAGTAGTCATATGCTTGCT 3'<br>5' GCCTGCTGCCTTCCT 3'          | ~400                 | Pochon et al. [3]                           | 52            |

Table 1: Primer sets used in this study: 'F' refers to the forward primer; 'R' refers to the reverse primer.
