# Supplementary material for: Marine environmental DNA biomonitoring reveals seasonal patterns in biodiversity and identifies ecosystem responses to anomalous climatic events
Source: PubMed Central journal article supplement (PMC6368286; doi:10.1371/journal.pgen.1007943), 2019-02-08
Supplement: pgen.1007943.s002.pdf [file pgen.1007943.s002.pdf]

**Table S2:** Number of Arthropoda detections in Rottneest Island zooplankton samples by each assay.

| Class                         | Order      | Family            | Genus                    | Species                            | Australia<br>[4, 5] | Rottneest<br>[5] | Copepod<br>3 | Cnidaria | Crust | Mollusca | Copepod<br>2 | Copepod<br>1 | 18S |
|-------------------------------|------------|-------------------|--------------------------|------------------------------------|---------------------|------------------|--------------|----------|-------|----------|--------------|--------------|-----|
| Branchiopoda -<br>Diplostraca |            |                   |                          |                                    | Yes                 | Yes              | 1            | 0        | 0     | 0        | 0            | 0            | 0   |
| Branchiopoda                  |            | Limnadiidae (ALA) |                          |                                    | Yes                 | Yes              | 1            | 0        | 0     | 0        | 0            | 0            | 0   |
|                               | Ctenopoda  | Sididae           | <i>Penilia</i>           | <i>Penilia avirostris</i>          | Yes                 | Yes              | 32           | 24       | 0     | 31       | 0            | 0            | 14  |
|                               | Onychopoda | Podonidae         | <i>Evadne</i>            | <i>Evadne spinifera</i>            | Yes                 | Yes              | 0            | 0        | 1     | 0        | 0            | 0            | 0   |
|                               |            |                   | <i>Pseudevadne</i>       |                                    | Yes                 | Yes              | 0            | 0        | 0     | 4        | 0            | 0            | 0   |
|                               |            |                   |                          | <i>Pseudevadne tergestina</i>      | Yes                 | Yes              | 0            | 6        | 0     | 0        | 0            | 0            | 0   |
| Hexanauplia                   | Calanoida  |                   |                          |                                    | Yes                 | Yes              | 115          | 15       | 0     | 77       | 222          | 2            | 125 |
|                               |            | Acartiidae        |                          |                                    | Yes                 | Yes              | 0            | 0        | 0     | 0        | 0            | 10           | 0   |
|                               |            |                   | <i>Acartia</i>           |                                    | Yes                 | Yes              | 0            | 0        | 0     | 0        | 0            | 0            | 10  |
|                               |            |                   | <i>Acartia (Acartia)</i> | <i>Acartia (Acartia) danae</i>     | Yes                 | Yes              | 20           | 0        | 0     | 1        | 0            | 0            | 1   |
|                               |            |                   |                          | <i>Acartia (Acartia) negligens</i> | Yes                 | Yes              | 46           | 17       | 0     | 1        | 0            | 0            | 0   |
|                               |            |                   | <i>Acartiella</i>        |                                    | No                  | No               | 0            | 0        | 0     | 0        | 32           | 0            | 0   |
|                               |            | Aetideidae        |                          |                                    | Yes                 | Yes              | 0            | 0        | 0     | 0        | 6            | 0            | 25  |
|                               |            |                   | <i>Aetideus</i>          | <i>Aetideus acutus</i>             | Yes                 | No               | 0            | 0        | 0     | 0        | 4            | 0            | 0   |
|                               |            |                   | <i>Gaetanus</i>          |                                    | Yes                 | No               | 0            | 0        | 0     | 0        | 0            | 0            | 17  |
|                               |            | Augaptilidae      |                          |                                    | Yes                 | Yes              | 0            | 0        | 0     | 0        | 0            | 0            | 4   |
|                               |            |                   | <i>Haloptilus</i>        |                                    | Yes                 | Yes              | 0            | 0        | 0     | 0        | 0            | 0            | 4   |
|                               |            |                   |                          | <i>Haloptilus longicornis</i>      | Yes                 | Yes              | 0            | 0        | 0     | 0        | 2            | 0            | 0   |
|                               |            | Calanidae         |                          |                                    | Yes                 | Yes              | 2            | 1        | 0     | 0        | 0            | 8            | 17  |
|                               |            |                   | <i>Canthocalanus</i>     | <i>Canthocalanus pauper</i>        | Yes                 | Yes              | 14           | 0        | 0     | 17       | 0            | 0            | 0   |
|                               |            |                   | <i>Cosmocalanus</i>      |                                    | Yes                 | Yes              | 2            | 0        | 0     | 0        | 0            | 1            | 0   |
|                               |            |                   |                          | <i>Cosmocalanus darwinii</i>       | Yes                 | Yes              | 36           | 1        | 0     | 3        | 0            | 42           | 0   |
|                               |            |                   | <i>Nannocalanus</i>      |                                    | Yes                 | Yes              | 1            | 0        | 0     | 5        | 0            | 3            | 0   |
|                               |            |                   | <i>Neocalanus</i>        | <i>Neocalanus gracilis</i>         | Yes                 | Yes              | 0            | 0        | 0     | 1        | 0            | 0            | 0   |
|                               |            |                   | <i>Undinula</i>          | <i>Undinula vulgaris</i>           | Yes                 | Yes              | 17           | 0        | 0     | 1        | 0            | 2            | 7   |
|                               |            | Candaciidae       |                          |                                    | Yes                 | Yes              | 4            | 0        | 0     | 0        | 0            | 0            | 0   |
|                               |            |                   | <i>Candacia</i>          |                                    | Yes                 | Yes              | 0            | 0        | 0     | 0        | 0            | 0            | 10  |
|                               |            |                   |                          | <i>Candacia bipinnata</i>          | Yes                 | Yes              | 0            | 0        | 0     | 2        | 0            | 0            | 0   |
|                               |            |                   |                          | <i>Candacia bradyi</i>             | Yes                 | Yes              | 0            | 0        | 0     | 40       | 2            | 0            | 0   |

| Class | Order | Family          | Genus                | Species                            | Australia<br>[4, 5] | Rottneest<br>[5] | Copepod<br>3 | Cnidaria | Crust | Mollusca | Copepod<br>2 | Copepod<br>1 | 18S |
|-------|-------|-----------------|----------------------|------------------------------------|---------------------|------------------|--------------|----------|-------|----------|--------------|--------------|-----|
|       |       |                 |                      | <i>Candacia catula</i>             | Yes                 | Yes              | 0            | 0        | 0     | 2        | 1            | 0            | 0   |
|       |       |                 |                      | <i>Candacia discaudata</i>         | Yes                 | No               | 0            | 0        | 0     | 2        | 1            | 0            | 0   |
|       |       |                 |                      | <i>Candacia pachydactyla</i>       | Yes                 | No               | 0            | 0        | 0     | 0        | 0            | 0            | 1   |
|       |       |                 |                      | <i>Candacia simplex</i>            | Yes                 | No               | 1            | 0        | 0     | 0        | 0            | 0            | 0   |
|       |       |                 |                      | <i>Candacia truncata</i>           | Yes                 | No               | 5            | 0        | 0     | 0        | 0            | 0            | 0   |
|       |       | Centropagidae   |                      |                                    | Yes                 | Yes              | 0            | 0        | 0     | 0        | 0            | 2            | 0   |
|       |       |                 | <i>Boeckella</i>     |                                    | Yes                 | Yes              | 0            | 0        | 0     | 2        | 0            | 0            | 0   |
|       |       |                 | <i>Centropages</i>   | <i>Centropages furcatus</i>        | Yes                 | No               | 9            | 0        | 0     | 2        | 0            | 0            | 0   |
|       |       |                 |                      | <i>Centropages orsinii</i>         | Yes                 | Yes              | 7            | 0        | 0     | 1        | 2            | 0            | 0   |
|       |       | Clausocalanidae | <i>Clausocalanus</i> |                                    | Yes                 | Yes              | 5            | 0        | 0     | 0        | 0            | 14           | 44  |
|       |       |                 |                      | <i>Clausocalanus arcuicornis</i>   | Yes                 | Yes              | 6            | 0        | 0     | 0        | 0            | 0            | 0   |
|       |       |                 |                      | <i>Clausocalanus farrani</i>       | Yes                 | Yes              | 0            | 0        | 0     | 1        | 0            | 34           | 0   |
|       |       |                 |                      | <i>Clausocalanus furcatus</i>      | Yes                 | Yes              | 54           | 3        | 0     | 21       | 53           | 0            | 0   |
|       |       |                 |                      | <i>Clausocalanus ingens</i>        | Yes                 | No               | 1            | 0        | 0     | 0        | 0            | 0            | 4   |
|       |       |                 |                      | <i>Clausocalanus jobei</i>         | Yes                 | Yes              | 2            | 0        | 0     | 0        | 2            | 23           | 0   |
|       |       |                 |                      | <i>Clausocalanus lividus</i>       | Yes                 | No               | 0            | 0        | 0     | 0        | 3            | 0            | 0   |
|       |       |                 |                      | <i>Clausocalanus mastigophorus</i> | Yes                 | Yes              | 0            | 0        | 0     | 0        | 1            | 0            | 0   |
|       |       |                 |                      | <i>Clausocalanus minor</i>         | Yes                 | Yes              | 6            | 0        | 0     | 0        | 25           | 15           | 0   |
|       |       |                 |                      | <i>Clausocalanus parapergens</i>   | Yes                 | No               | 1            | 0        | 0     | 0        | 23           | 4            | 0   |
|       |       |                 |                      | <i>Clausocalanus pergens</i>       | Yes                 | No               | 1            | 0        | 0     | 0        | 0            | 0            | 0   |
|       |       | Eucalanidae     | <i>Ctenocalanus</i>  | <i>Ctenocalanus vanus</i>          | Yes                 | Yes              | 16           | 0        | 0     | 0        | 7            | 32           | 0   |
|       |       |                 |                      |                                    | Yes                 | Yes              | 9            | 0        | 0     | 3        | 0            | 0            | 20  |
|       |       |                 | <i>Eucalanus</i>     |                                    | Yes                 | No               | 0            | 0        | 0     | 0        | 1            | 0            | 0   |
|       |       |                 | <i>Pareucalanus</i>  | <i>Pareucalanus attenuatus</i>     | No                  | No               | 0            | 3        | 0     | 0        | 0            | 0            | 0   |
|       |       |                 |                      | <i>Pareucalanus sewelli</i>        | Yes                 | No               | 3            | 0        | 0     | 0        | 0            | 0            | 0   |
|       |       | Euchaetidae     |                      |                                    | Yes                 | Yes              | 0            | 0        | 0     | 0        | 0            | 1            | 0   |
|       |       |                 | <i>Euchaeta</i>      | <i>Euchaeta concinna</i>           | Yes                 | No               | 4            | 0        | 0     | 0        | 0            | 2            | 0   |
|       |       |                 |                      | <i>Euchaeta longicornis</i>        | No                  | No               | 0            | 0        | 0     | 1        | 0            | 0            | 0   |

| Class | Order | Family           | Genus                   | Species                              | Australia<br>[4, 5] | Rottneest<br>[5] | Copepod<br>3 | Cnidaria | Crust | Mollusca | Copepod<br>2 | Copepod<br>1 | 18S |
|-------|-------|------------------|-------------------------|--------------------------------------|---------------------|------------------|--------------|----------|-------|----------|--------------|--------------|-----|
|       |       |                  |                         | <i>Euchaeta marina</i>               | Yes                 | No               | 0            | 0        | 0     | 9        | 11           | 0            | 0   |
|       |       | Lucicutiidae     | <i>Lucicutia</i>        | <i>Lucicutia flavicornis</i>         | Yes                 | Yes              | 0            | 0        | 0     | 31       | 29           | 0            | 0   |
|       |       | Metridinidae     | <i>Pleuromamma</i>      | <i>Pleuromamma gracilis</i>          | Yes                 | Yes              | 0            | 0        | 0     | 0        | 7            | 0            | 0   |
|       |       |                  |                         | <i>Pleuromamma piseki</i>            | Yes                 | Yes              | 0            | 0        | 0     | 0        | 9            | 0            | 0   |
|       |       | Paracalanidae    |                         |                                      | Yes                 | Yes              | 0            | 0        | 0     | 0        | 16           | 8            | 1   |
|       |       |                  | <i>Acrocalanus</i>      |                                      | Yes                 | Yes              | 0            | 0        | 0     | 0        | 2            | 0            | 0   |
|       |       |                  |                         | <i>Acrocalanus gracilis</i>          | Yes                 | Yes              | 11           | 0        | 0     | 0        | 2            | 1            | 0   |
|       |       |                  |                         | <i>Acrocalanus monachus</i>          | Yes                 | No               | 0            | 0        | 0     | 0        | 0            | 0            | 10  |
|       |       |                  | <i>Bestiolina</i>       |                                      | Yes                 | Yes              | 38           | 0        | 0     | 29       | 0            | 0            | 0   |
|       |       |                  | <i>Calocalanus</i>      |                                      | Yes                 | Yes              | 25           | 0        | 0     | 1        | 48           | 1            | 0   |
|       |       |                  |                         | <i>Calocalanus minutus</i>           | No                  | No               | 19           | 0        | 0     | 0        | 0            | 0            | 0   |
|       |       |                  |                         | <i>Calocalanus pavo</i>              | Yes                 | Yes              | 11           | 0        | 0     | 14       | 3            | 8            | 0   |
|       |       |                  |                         | <i>Calocalanus plumulosus</i>        | Yes                 | Yes              | 13           | 0        | 0     | 0        | 28           | 0            | 14  |
|       |       |                  | <i>Delibus</i>          |                                      | Yes                 | No               | 22           | 0        | 0     | 34       | 29           | 13           | 0   |
|       |       |                  | <i>Mecynocera</i>       | <i>Mecynocera clausi</i>             | Yes                 | Yes              | 0            | 0        | 0     | 40       | 0            | 0            | 4   |
|       |       |                  | <i>Paracalanus</i>      |                                      | Yes                 | Yes              | 43           | 0        | 0     | 10       | 58           | 4            | 0   |
|       |       |                  |                         | <i>Paracalanus aculeatus</i>         | Yes                 | Yes              | 45           | 0        | 0     | 0        | 0            | 0            | 0   |
|       |       |                  |                         | <i>Paracalanus denudatus</i>         | Yes                 | No               | 0            | 0        | 0     | 0        | 21           | 29           | 0   |
|       |       |                  |                         | <i>Paracalanus gracilis</i>          | No                  | No               | 0            | 0        | 0     | 0        | 17           | 0            | 0   |
|       |       |                  |                         | <i>Paracalanus indicus</i>           | Yes                 | Yes              | 55           | 0        | 0     | 55       | 0            | 8            | 0   |
|       |       |                  |                         | <i>Paracalanus nanus</i>             | No                  | No               | 41           | 0        | 0     | 4        | 30           | 5            | 0   |
|       |       |                  |                         | <i>Paracalanus parvus</i>            | Yes                 | Yes              | 0            | 0        | 0     | 0        | 0            | 0            | 54  |
|       |       | Pontellidae      | <i>Labidocera</i>       | <i>Labidocera acuta</i>              | Yes                 | No               | 0            | 2        | 0     | 1        | 0            | 0            | 0   |
|       |       |                  |                         | <i>Labidocera minuta</i>             | Yes                 | Yes              | 33           | 0        | 0     | 2        | 0            | 0            | 0   |
|       |       |                  | <i>Pontellina</i>       | <i>Pontellina plumata</i>            | Yes                 | No               | 1            | 11       | 0     | 1        | 0            | 0            | 0   |
|       |       | Rhincalanidae    | <i>Rhincalanus</i>      |                                      | Yes                 | Yes              | 1            | 0        | 0     | 0        | 0            | 0            | 0   |
|       |       |                  |                         | <i>Rhincalanus cornutus</i>          | Yes                 | No               | 0            | 0        | 0     | 1        | 0            | 0            | 0   |
|       |       | Scolecitrichidae | <i>Scolecithricella</i> |                                      | Yes                 | No               | 1            | 0        | 0     | 0        | 0            | 0            | 0   |
|       |       |                  |                         | <i>Scolecithricella longispinosa</i> | No                  | No               | 1            | 0        | 0     | 0        | 2            | 0            | 0   |
|       |       |                  | <i>Scolecithrix</i>     | <i>Scolecithrix danae</i>            | Yes                 | Yes              | 17           | 0        | 0     | 0        | 0            | 0            | 0   |

| Class        | Order                             | Family         | Genus               | Species                        | Australia<br>[4, 5] | Rottneest<br>[5] | Copepod<br>3 | Cnidaria | Crust | Mollusca | Copepod<br>2 | Copepod<br>1 | 18S |
|--------------|-----------------------------------|----------------|---------------------|--------------------------------|---------------------|------------------|--------------|----------|-------|----------|--------------|--------------|-----|
|              |                                   | Subeucalanidae | <i>Subeucalanus</i> |                                | Yes                 | Yes              | 5            | 0        | 0     | 10       | 0            | 0            | 4   |
|              |                                   |                |                     | <i>Subeucalanus mucronatus</i> | Yes                 | No               | 2            | 1        | 0     | 3        | 1            | 0            | 0   |
|              |                                   |                |                     | <i>Subeucalanus pileatus</i>   | Yes                 | Yes              | 1            | 0        | 0     | 9        | 0            | 0            | 0   |
|              |                                   |                |                     | <i>Subeucalanus subtenuis</i>  | Yes                 | No               | 42           | 0        | 0     | 0        | 0            | 0            | 0   |
|              |                                   | Temoridae      | <i>Temora</i>       |                                | Yes                 | Yes              | 0            | 0        | 0     | 0        | 0            | 0            | 5   |
|              |                                   |                |                     | <i>Temora discaudata</i>       | Yes                 | Yes              | 1            | 0        | 0     | 5        | 1            | 0            | 0   |
|              | Cyclopoida -<br>Poecilostomatoida |                |                     |                                | Yes                 | Yes              | 0            | 0        | 0     | 3        | 2            | 2            | 0   |
|              | Cyclopoida                        | Corycaeidae    | <i>Farranula</i>    | <i>Farranula gibbula</i>       | Yes                 | Yes              | 0            | 0        | 0     | 7        | 0            | 0            | 0   |
|              |                                   | Oncaea         | <i>Oncaea</i>       |                                | Yes                 | Yes              | 0            | 0        | 0     | 2        | 0            | 8            | 0   |
|              |                                   |                |                     | <i>Oncaea mediterranea</i>     | Yes                 | Yes              | 0            | 0        | 0     | 6        | 0            | 10           | 0   |
|              |                                   |                |                     | <i>Oncaea scottodiarloi</i>    | Yes                 | No               | 0            | 0        | 0     | 3        | 0            | 12           | 0   |
|              |                                   |                |                     | <i>Oncaea waldemari</i>        | Yes                 | No               | 0            | 1        | 0     | 4        | 0            | 36           | 0   |
|              |                                   |                | <i>Triconia</i>     |                                | Yes                 | Yes              | 0            | 0        | 0     | 4        | 0            | 27           | 0   |
|              |                                   |                |                     | <i>Triconia minuta</i>         | No                  | No               | 0            | 0        | 0     | 0        | 0            | 9            | 0   |
|              |                                   |                |                     | <i>Triconia umerus</i>         | Yes                 | No               | 0            | 0        | 0     | 0        | 0            | 17           | 0   |
|              |                                   | Sapphirinidae  |                     |                                | Yes                 | Yes              | 0            | 0        | 0     | 2        | 1            | 0            | 0   |
|              |                                   |                | <i>Copila</i>       | <i>Copilia mirabilis</i>       | Yes                 | Yes              | 0            | 0        | 0     | 12       | 0            | 0            | 0   |
|              |                                   |                | <i>Sapphirina</i>   | <i>Sapphirina metallina</i>    | Yes                 | No               | 0            | 0        | 0     | 1        | 1            | 0            | 0   |
|              | Harpacticoida                     | Euterpinidae   | <i>Euterpina</i>    | <i>Euterpina acutifrons</i>    | Yes                 | Yes              | 0            | 0        | 0     | 0        | 0            | 0            | 1   |
|              | Lepadiformes                      | Lepadidae      | <i>Conchoderma</i>  | <i>Conchoderma virgatum</i>    | Yes                 | No               | 2            | 2        | 0     | 1        | 0            | 0            | 0   |
| Insecta      | Coleoptera                        | Hydrophilidae  |                     |                                | Yes                 | Yes              | 0            | 1        | 0     | 0        | 0            | 0            | 0   |
| Malacostraca | Amphipoda                         |                |                     |                                | Yes                 | Yes              | 0            | 0        | 0     | 1        | 0            | 0            | 0   |
|              |                                   | Ischyroceridae | <i>Jassa</i>        | <i>Jassa slatteryi</i>         | Yes                 | No               | 1            | 0        | 0     | 0        | 0            | 0            | 0   |
|              |                                   | Lestrigonidae  | <i>Hyperietta</i>   |                                | Yes                 | Yes              | 2            | 0        | 0     | 0        | 0            | 0            | 0   |
|              |                                   |                |                     | <i>Hyperietta parviceps</i>    | No                  | No               | 0            | 0        | 0     | 2        | 0            | 0            | 0   |
|              |                                   |                | <i>Hyperioides</i>  | <i>Hyperioides longipes</i>    | Yes                 | No               | 1            | 0        | 0     | 0        | 0            | 0            | 0   |
|              |                                   |                |                     | <i>Hyperioides sibaginis</i>   | Yes                 | No               | 2            | 0        | 0     | 1        | 0            | 0            | 0   |
|              |                                   |                | <i>Lestrigonus</i>  | <i>Lestrigonus bengalensis</i> | Yes                 | Yes              | 0            | 0        | 0     | 0        | 0            | 2            | 0   |
|              | Decapoda - Anomura                |                |                     |                                | Yes                 | Yes              | 2            | 0        | 0     | 0        | 0            | 0            | 0   |

| Class | Order                  | Family          | Genus                | Species                        | Australia<br>[4, 5] | Rottneest<br>[5] | Copepod<br>3 | Cnidaria | Crust | Mollusca | Copepod<br>2 | Copepod<br>1 | 18S |
|-------|------------------------|-----------------|----------------------|--------------------------------|---------------------|------------------|--------------|----------|-------|----------|--------------|--------------|-----|
|       | Decapoda - Caridea     |                 |                      |                                | Yes                 | Yes              | 1            | 0        | 0     | 0        | 0            | 0            | 0   |
|       | Decapoda - Pilumnoidea |                 |                      |                                | Yes                 | Yes              | 0            | 0        | 41    | 0        | 0            | 0            | 0   |
|       | Decapoda - Xanthoidea  |                 |                      |                                | Yes                 | Yes              | 1            | 0        | 0     | 0        | 0            | 0            | 0   |
|       | Decapoda               |                 |                      |                                | Yes                 | Yes              | 2            | 5        | 6     | 5        | 0            | 0            | 20  |
|       |                        | Alpheidae       |                      |                                | Yes                 | Yes              | 0            | 0        | 0     | 19       | 0            | 0            | 0   |
|       |                        |                 | <i>Alpheus</i>       |                                | Yes                 | Yes              | 0            | 0        | 0     | 0        | 0            | 0            | 2   |
|       |                        | Axiidae         | <i>Spongiaxius</i>   | <i>Spongiaxius brucei</i>      | Yes                 | No               | 0            | 0        | 0     | 0        | 0            | 0            | 1   |
|       |                        | Callinassidae   |                      |                                | Yes                 | Yes              | 0            | 0        | 0     | 0        | 0            | 0            | 1   |
|       |                        |                 | <i>Trypaea</i>       | <i>Trypaea australiensis</i>   | Yes                 | No               | 0            | 0        | 3     | 0        | 0            | 0            | 0   |
|       |                        | Diogenidae      | <i>Calcinus</i>      | <i>Calcinus dapsiles</i>       | Yes                 | Yes              | 10           | 0        | 9     | 0        | 0            | 0            | 0   |
|       |                        | Epialtidae      | <i>Menaethius</i>    |                                | Yes                 | No               | 0            | 0        | 4     | 0        | 0            | 0            | 0   |
|       |                        | Hippolytidae    |                      |                                | Yes                 | Yes              | 0            | 0        | 1     | 0        | 0            | 0            | 1   |
|       |                        |                 | <i>Alope</i>         | <i>Alope orientalis</i>        | Yes                 | Yes              | 0            | 0        | 5     | 0        | 0            | 0            | 0   |
|       |                        |                 | <i>Hippolyte</i>     | <i>Hippolyte bifidirostris</i> | No                  | No               | 0            | 0        | 0     | 0        | 0            | 0            | 2   |
|       |                        | Hymenosomatidae | <i>Haliscarcinus</i> |                                | Yes                 | Yes              | 0            | 0        | 1     | 1        | 0            | 0            | 1   |
|       |                        | Luciferidae     | <i>Belzebub</i>      | <i>Belzebub intermedius</i>    | No                  | No               | 5            | 0        | 0     | 0        | 0            | 0            | 0   |
|       |                        |                 | <i>Lucifer</i>       |                                | Yes                 | Yes              | 0            | 0        | 0     | 10       | 0            | 0            | 0   |
|       |                        |                 |                      | <i>Lucifer typus</i>           | Yes                 | No               | 3            | 0        | 0     | 0        | 0            | 0            | 0   |
|       |                        | Lysmatidae      | <i>Lysmata</i>       | <i>Lysmata ternatensis</i>     | No                  | No               | 0            | 0        | 1     | 0        | 0            | 0            | 0   |
|       |                        | Palinuridae     |                      |                                | Yes                 | Yes              | 1            | 0        | 0     | 0        | 0            | 0            | 0   |
|       |                        |                 | <i>Panulirus</i>     | <i>Panulirus cygnus</i>        | Yes                 | Yes              | 0            | 0        | 4     | 0        | 0            | 0            | 0   |
|       |                        | Pandalidae      |                      |                                | Yes                 | Yes              | 0            | 0        | 0     | 0        | 0            | 0            | 1   |
|       |                        | Panopeidae      |                      |                                | Yes                 | No               | 1            | 0        | 0     | 0        | 0            | 0            | 0   |
|       |                        |                 | <i>Eurytium</i>      |                                | No                  | No               | 2            | 0        | 0     | 0        | 0            | 0            | 0   |
|       |                        | Pasiphaeidae    | <i>Leptocheila</i>   |                                | Yes                 | Yes              | 0            | 0        | 0     | 0        | 0            | 0            | 3   |
|       |                        | Penaeidae       |                      |                                | Yes                 | Yes              | 0            | 0        | 2     | 0        | 0            | 0            | 0   |
|       |                        | Polybiidae      |                      |                                | Yes                 | Yes              | 0            | 0        | 3     | 0        | 0            | 0            | 0   |
|       |                        |                 | <i>Liocarcinus</i>   | <i>Liocarcinus corrugatus</i>  | Yes                 | Yes              | 2            | 0        | 0     | 0        | 0            | 0            | 0   |
|       |                        | Portunidae      | <i>Thalamita</i>     |                                | Yes                 | Yes              | 0            | 0        | 4     | 0        | 0            | 0            | 0   |
|       |                        |                 |                      | <i>Thalamita admete</i>        | Yes                 | No               | 0            | 0        | 3     | 0        | 0            | 0            | 0   |
|       |                        | Processidae     | <i>Nikoides</i>      |                                | Yes                 | No               | 0            | 0        | 2     | 0        | 0            | 0            | 0   |

| Class     | Order        | Family         | Genus               | Species                        | Australia<br>[4, 5] | Rottneest<br>[5] | Copepod<br>3 | Cnidaria | Crust | Mollusca | Copepod<br>2 | Copepod<br>1 | 18S |
|-----------|--------------|----------------|---------------------|--------------------------------|---------------------|------------------|--------------|----------|-------|----------|--------------|--------------|-----|
|           |              |                |                     | <i>Nikoides danae</i>          | Yes                 | No               | 0            | 0        | 0     | 0        | 0            | 0            | 4   |
|           |              | Pseudoziidae   |                     |                                | Yes                 | No               | 0            | 0        | 0     | 1        | 0            | 0            | 0   |
|           |              | Scyllaridae    | <i>Crenarctus</i>   | <i>Crenarctus bicuspidatus</i> | No                  | No               | 0            | 0        | 1     | 0        | 0            | 0            | 0   |
|           |              | Xanthidae      |                     |                                | Yes                 | Yes              | 0            | 0        | 3     | 0        | 0            | 0            | 0   |
|           |              |                | <i>Actaeodes</i>    |                                | Yes                 | Yes              | 0            | 0        | 7     | 0        | 0            | 0            | 0   |
|           |              |                | <i>Danielea</i>     | <i>Danielea noelensis</i>      | No                  | No               | 0            | 0        | 1     | 0        | 0            | 0            | 0   |
|           |              |                | <i>Nanocassiope</i> |                                | Yes                 | Yes              | 3            | 0        | 0     | 0        | 0            | 0            | 0   |
|           |              |                |                     | <i>Nanocassiope alcocki</i>    | Yes                 | No               | 1            | 0        | 11    | 0        | 0            | 0            | 0   |
|           |              |                | <i>Paraxanthias</i> | <i>Paraxanthias elegans</i>    | Yes                 | No               | 0            | 0        | 2     | 0        | 0            | 0            | 0   |
|           | Euphausiacea |                |                     |                                | Yes                 | Yes              | 0            | 0        | 6     | 0        | 0            | 0            | 0   |
|           |              | Euphausiidae   |                     |                                | Yes                 | Yes              | 0            | 0        | 0     | 0        | 0            | 0            | 2   |
|           |              |                | <i>Euphausia</i>    |                                | Yes                 | Yes              | 0            | 0        | 0     | 1        | 0            | 0            | 0   |
|           |              |                |                     | <i>Euphausia hemigibba</i>     | Yes                 | No               | 4            | 0        | 0     | 3        | 0            | 0            | 0   |
|           |              |                |                     | <i>Euphausia recurva</i>       | Yes                 | Yes              | 4            | 0        | 7     | 0        | 0            | 0            | 0   |
|           |              |                | <i>Stylocheiron</i> | <i>Stylocheiron carinatum</i>  | Yes                 | No               | 0            | 1        | 0     | 0        | 0            | 0            | 0   |
|           | Sessilia     |                |                     |                                | Yes                 | Yes              | 0            | 1        | 0     | 0        | 0            | 0            | 0   |
| Ostracoda | Halocyprida  | Halocyprididae |                     |                                | Yes                 | Yes              | 0            | 0        | 0     | 1        | 0            | 0            | 0   |
|           | Myodocopida  | Cypridinidae   |                     |                                | Yes                 | Yes              | 0            | 0        | 0     | 0        | 0            | 0            | 5   |
