# Supplementary material for: Marine environmental DNA biomonitoring reveals seasonal patterns in biodiversity and identifies ecosystem responses to anomalous climatic events
Source: PubMed Central journal article supplement (PMC6368286; doi:10.1371/journal.pgen.1007943), 2019-02-08
Supplement: pgen.1007943.s003.pdf [file pgen.1007943.s003.pdf]

**Table S3:** Number of Chordata detections in Rottneest Island zooplankton samples by each assay.

| Class          | Order          | Family           | Genus                  | Species                           | In Australia [5] | Rottneest [5] | Copepod 3 | Cnidaria | Fish | Mollusca | Copepod 1 | 18S |
|----------------|----------------|------------------|------------------------|-----------------------------------|------------------|---------------|-----------|----------|------|----------|-----------|-----|
| Actinopterygii | Anguilliformes | Congridae        | <i>Gnathophis</i>      |                                   | Yes              | Yes           | 1         | 0        | 0    | 0        | 0         | 0   |
|                |                | Muraenidae       |                        |                                   | Yes              | Yes           | 0         | 0        | 1    | 0        | 0         | 0   |
|                | Aulopiformes   | Aulopidae        |                        |                                   | Yes              | Yes           | 2         | 0        | 0    | 0        | 0         | 0   |
|                |                |                  | <i>Latropiscis</i>     | <i>Latropiscis purpurissatus</i>  | Yes              | Yes           | 0         | 0        | 1    | 0        | 0         | 0   |
|                | Beryciformes   | Notosudidae      | <i>Scopelosaurus</i>   |                                   | Yes              | Yes           | 1         | 0        | 0    | 0        | 0         | 0   |
|                |                |                  | Berycidae              | <i>Centroberyx</i>                |                  | Yes           | Yes       | 0        | 0    | 1        | 0         | 0   |
|                | Clupiformes    | Clupeidae        |                        | <i>Centroberyx lineatus</i>       | Yes              | Yes           | 1         | 0        | 0    | 1        | 0         | 0   |
|                |                |                  | <i>Sardinops</i>       | <i>Sardinops sagax</i>            | Yes              | Yes           | 31        | 30       | 37   | 31       | 0         | 0   |
|                |                | Dussumieriidae   | <i>Spratelloides</i>   |                                   | Yes              | Yes           | 0         | 0        | 1    | 0        | 0         | 0   |
|                |                |                  | <i>Etrumeus</i>        |                                   | Yes              | Yes           | 0         | 0        | 0    | 2        | 0         | 0   |
|                |                | Engraulidae      |                        | <i>Etrumeus teres</i>             | Yes              | Yes           | 10        | 12       | 20   | 11       | 0         | 0   |
|                |                |                  | <i>Engraulis</i>       |                                   | Yes              | Yes           | 0         | 0        | 16   | 2        | 0         | 0   |
|                | Gadiformes     | Moridae          |                        | <i>Engraulis japonicus</i>        | No               | No            | 8         | 0        | 0    | 0        | 0         | 0   |
|                |                |                  | <i>Lotella</i>         | <i>Lotella rhacina</i>            | Yes              | Yes           | 0         | 0        | 2    | 0        | 0         | 0   |
|                | Myctophiformes | Myctophidae      |                        |                                   | Yes              | Yes           | 0         | 0        | 1    | 0        | 0         | 0   |
|                |                |                  | <i>Benthoosema</i>     | <i>Benthoosema fibulatum</i>      | Yes              | Yes           | 0         | 0        | 1    | 0        | 0         | 0   |
|                |                |                  | <i>Diaphus</i>         |                                   | Yes              | Yes           | 1         | 0        | 6    | 0        | 0         | 0   |
|                |                |                  | <i>Lampanyctus</i>     | <i>Lampanyctus alatus</i>         | Yes              | Yes           | 1         | 0        | 0    | 0        | 0         | 0   |
|                |                |                  | <i>Notolychnus</i>     | <i>Notolychnus valdiviae</i>      | Yes              | Yes           | 0         | 0        | 1    | 0        | 0         | 0   |
|                |                |                  | <i>Scopelopsis</i>     | <i>Scopelopsis multipunctatus</i> | Yes              | Yes           | 1         | 0        | 0    | 0        | 0         | 0   |
|                | Perciformes    | Apogoninae       |                        |                                   | Yes              | Yes           | 1         | 0        | 0    | 0        | 0         | 0   |
|                |                |                  | <i>Apogon</i>          | <i>Apogon doederleini</i>         | Yes              | Yes           | 1         | 1        | 0    | 1        | 0         | 0   |
|                |                | Arripidae        | <i>Arripis</i>         | <i>Arripis trutta</i>             | Yes              | Yes           | 0         | 0        | 1    | 0        | 0         | 0   |
|                |                |                  | <i>Cirripectes</i>     | <i>Cirripectes castaneus</i>      | Yes              | No            | 1         | 0        | 0    | 0        | 0         | 0   |
|                |                | Carangidae       | <i>Pseudocaranx</i>    | <i>Pseudocaranx wrighti</i>       | Yes              | Yes           | 1         | 0        | 2    | 0        | 0         | 0   |
|                |                |                  | <i>Trachurus</i>       |                                   | Yes              | Yes           | 0         | 0        | 8    | 1        | 0         | 0   |
|                |                | Cheilodactylidae | <i>Nemadactylus</i>    |                                   | Yes              | Yes           | 0         | 0        | 2    | 0        | 0         | 0   |
|                |                |                  | <i>Emmelichthyidae</i> | <i>Plagiogeneion</i>              |                  | Yes           | Yes       | 1        | 0    | 0        | 0         | 0   |
|                |                |                  |                        | <i>Plagiogeneion rubiginosum</i>  | Yes              | Yes           | 0         | 0        | 1    | 0        | 0         | 0   |

| Class | Order | Family          | Genus                  | Species                          | In Australia [5] | Rottneest [5] | Copepod 3 | Cnidaria | Fish | Mollusca | Copepod 1 | 18S |
|-------|-------|-----------------|------------------------|----------------------------------|------------------|---------------|-----------|----------|------|----------|-----------|-----|
|       |       | Gerreidae       | <i>Parequula</i>       |                                  | Yes              | Yes           | 0         | 0        | 1    | 0        | 0         | 0   |
|       |       |                 |                        | <i>Parequula melbournensis</i>   | Yes              | Yes           | 0         | 0        | 3    | 0        | 0         | 0   |
|       |       | Glaucosomatidae | <i>Glaucosoma</i>      | <i>Glaucosoma hebraicum</i>      | Yes              | Yes           | 0         | 0        | 1    | 0        | 0         | 0   |
|       |       | Gobiidae        |                        |                                  | Yes              | Yes           | 0         | 0        | 1    | 0        | 0         | 0   |
|       |       | Haemulidae      |                        |                                  | Yes              | Yes           | 0         | 0        | 1    | 0        | 0         | 0   |
|       |       | Kyphosidae      | <i>Kyphosus</i>        |                                  | Yes              | Yes           | 0         | 0        | 1    | 0        | 0         | 0   |
|       |       | Labridae        |                        |                                  | Yes              | Yes           | 5         | 0        | 4    | 0        | 0         | 0   |
|       |       |                 | <i>Austrolabrus</i>    | <i>Austrolabrus maculatus</i>    | Yes              | Yes           | 0         | 0        | 16   | 0        | 0         | 0   |
|       |       |                 | <i>Choerodon</i>       |                                  | Yes              | Yes           | 0         | 0        | 1    | 0        | 0         | 0   |
|       |       |                 | <i>Coris</i>           |                                  | Yes              | Yes           | 0         | 0        | 2    | 0        | 0         | 0   |
|       |       |                 |                        | <i>Coris auricularis</i>         | Yes              | Yes           | 1         | 0        | 0    | 0        | 0         | 0   |
|       |       |                 | <i>Halichoeres</i>     | <i>Halichoeres brownfieldi</i>   | Yes              | Yes           | 0         | 0        | 4    | 0        | 0         | 0   |
|       |       |                 | <i>Labroides</i>       | <i>Labroides dimidiatus</i>      | Yes              | Yes           | 0         | 0        | 1    | 0        | 0         | 0   |
|       |       |                 | <i>Notolabrus</i>      |                                  | Yes              | Yes           | 1         | 0        | 0    | 0        | 0         | 0   |
|       |       |                 | <i>Ophthalmolepis</i>  | <i>Ophthalmolepis lineolata</i>  | Yes              | Yes           | 0         | 0        | 1    | 0        | 0         | 0   |
|       |       |                 | <i>Pictilabrus</i>     |                                  | Yes              | Yes           | 0         | 0        | 15   | 0        | 0         | 0   |
|       |       |                 | <i>Pseudolabrus</i>    | <i>Pseudolabrus biserialis</i>   | Yes              | Yes           | 0         | 0        | 1    | 0        | 0         | 0   |
|       |       |                 | <i>Thalassoma</i>      |                                  | Yes              | Yes           | 0         | 0        | 1    | 0        | 0         | 0   |
|       |       | Mullidae        |                        |                                  | Yes              | Yes           | 0         | 0        | 0    | 11       | 0         | 0   |
|       |       |                 | <i>Upeneichthys</i>    |                                  | Yes              | Yes           | 0         | 0        | 2    | 0        | 0         | 0   |
|       |       |                 |                        | <i>Upeneichthys stotti</i>       | Yes              | Yes           | 0         | 0        | 10   | 0        | 0         | 0   |
|       |       |                 |                        | <i>Upeneichthys vlamingii</i>    | Yes              | Yes           | 0         | 0        | 0    | 1        | 0         | 0   |
|       |       | Odacidae        |                        |                                  | Yes              | Yes           | 0         | 0        | 3    | 0        | 0         | 0   |
|       |       |                 | <i>Heteroscarus</i>    | <i>Heteroscarus acroptilus</i>   | Yes              | Yes           | 3         | 0        | 0    | 0        | 0         | 0   |
|       |       |                 | <i>Odax</i>            | <i>Odax acroptilus</i>           | Yes              | Yes           | 0         | 0        | 3    | 0        | 0         | 0   |
|       |       | Opistognathidae |                        |                                  | Yes              | Yes           | 0         | 0        | 1    | 0        | 0         | 0   |
|       |       | Pempheridae     | <i>Parapriacanthus</i> |                                  | Yes              | Yes           | 0         | 0        | 3    | 0        | 0         | 0   |
|       |       |                 |                        | <i>Parapriacanthus elongatus</i> | Yes              | Yes           | 0         | 0        | 11   | 0        | 0         | 0   |
|       |       | Pinguipedidae   | <i>Parapercis</i>      | <i>Parapercis ramsayi</i>        | Yes              | Yes           | 0         | 0        | 1    | 0        | 0         | 0   |
|       |       | Pomacentridae   | <i>Chromis</i>         |                                  | Yes              | Yes           | 4         | 0        | 5    | 0        | 0         | 0   |
|       |       |                 |                        | <i>Chromis notata</i>            | No               | No            | 4         | 0        | 4    | 0        | 0         | 0   |
|       |       | Scaridae        | <i>Scarus</i>          | <i>Scarus chameleon</i>          | Yes              | Yes           | 1         | 0        | 0    | 0        | 0         | 0   |

| Class          | Order             | Family          | Genus                 | Species                         | In Australia [5] | Rottneest [5] | Copepod 3 | Cnidaria | Fish | Mollusca | Copepod 1 | 18S |
|----------------|-------------------|-----------------|-----------------------|---------------------------------|------------------|---------------|-----------|----------|------|----------|-----------|-----|
|                |                   | Scombridae      | <i>Scomber</i>        |                                 | Yes              | Yes           | 1         | 0        | 1    | 0        | 0         | 0   |
|                |                   | Sillaginidae    | <i>Sillaginodes</i>   | <i>Sillaginodes punctatus</i>   | Yes              | Yes           | 0         | 0        | 2    | 0        | 0         | 0   |
|                |                   |                 | <i>Sillago</i>        |                                 | Yes              | Yes           | 1         | 0        | 1    | 0        | 0         | 0   |
|                |                   |                 |                       | <i>Sillago bassensis</i>        | Yes              | Yes           | 1         | 0        | 1    | 0        | 0         | 0   |
|                | Scorpaeniformes   | Sparidae        |                       |                                 | Yes              | Yes           | 0         | 0        | 1    | 0        | 0         | 0   |
|                |                   | Neosebastidae   | <i>Neosebastes</i>    |                                 | Yes              | Yes           | 0         | 0        | 2    | 0        | 0         | 0   |
|                |                   | Platycephalidae | <i>Leviprora</i>      | <i>Leviprora inops</i>          | Yes              | Yes           | 0         | 0        | 0    | 1        | 0         | 0   |
|                |                   |                 | <i>Platycephalus</i>  |                                 | Yes              | Yes           | 0         | 0        | 5    | 0        | 0         | 0   |
|                |                   |                 | <i>Thysanophrys</i>   | <i>Thysanophrys cirronasa</i>   | Yes              | Yes           | 0         | 0        | 0    | 1        | 0         | 0   |
|                |                   | Triglidae       | <i>Lepidotrigla</i>   |                                 | Yes              | Yes           | 0         | 0        | 2    | 0        | 0         | 0   |
|                | Stomiiformes      | Gonostomatidae  | <i>Cyclothone</i>     |                                 | Yes              | Yes           | 0         | 0        | 1    | 0        | 0         | 0   |
|                |                   | Phosichthyidae  | <i>Vinciguerra</i>    |                                 | Yes              | Yes           | 3         | 0        | 0    | 1        | 0         | 0   |
|                | Tetraodontiformes | Monacanthidae   |                       |                                 | Yes              | Yes           | 3         | 0        | 3    | 0        | 0         | 0   |
|                |                   |                 | <i>Acanthaluteres</i> |                                 | Yes              | Yes           | 0         | 1        | 0    | 0        | 0         | 0   |
|                |                   |                 |                       | <i>Acanthaluteres vittiger</i>  | Yes              | Yes           | 0         | 0        | 4    | 0        | 0         | 0   |
|                |                   |                 | <i>Eubalichthys</i>   | <i>Eubalichthys mosaicus</i>    | Yes              | Yes           | 2         | 1        | 1    | 0        | 1         | 0   |
|                |                   |                 | <i>Nelusetta</i>      | <i>Nelusetta ayraudi</i>        | Yes              | Yes           | 1         | 0        | 1    | 0        | 0         | 0   |
|                |                   |                 | <i>Scobinichthys</i>  | <i>Scobinichthys granulatus</i> | Yes              | Yes           | 0         | 0        | 1    | 0        | 0         | 0   |
| Amphibia       | Anura             | Ranidae         |                       |                                 | Yes              | No            | 1         | 0        | 0    | 0        | 0         | 0   |
| Appendicularia | Copelata          | Oikopleuridae   | <i>Oikopleura</i>     |                                 | Yes              | No            | 0         | 0        | 0    | 0        | 0         | 1   |
|                |                   |                 |                       | <i>Oikopleura dioica</i>        | Yes (6)          | No            | 0         | 0        | 0    | 0        | 0         | 10  |
| Ascidacea      | Phlebobrancia     | Perophoridae    |                       |                                 | Yes              | Yes           | 0         | 0        | 0    | 0        | 0         | 1   |
|                | Stolidobranchia   | Pyuridae        | <i>Herdmania</i>      | <i>Herdmania momus</i>          | Yes              | Yes           | 0         | 0        | 0    | 0        | 0         | 1   |
| Thaliacea      | Salpida           | Salpidae        |                       |                                 | Yes              | Yes           | 0         | 0        | 0    | 0        | 0         | 1   |
|                |                   |                 | <i>Brooksia</i>       | <i>Brooksia rostrata</i>        | Yes              | No            | 0         | 0        | 0    | 0        | 0         | 1   |
|                |                   |                 | <i>Cyclosalpa</i>     |                                 | Yes              | No            | 0         | 0        | 0    | 0        | 0         | 1   |
|                |                   |                 | <i>Thalia</i>         |                                 | Yes              | No            | 0         | 0        | 0    | 0        | 0         | 8   |
|                | Doliolida         | Doliolidae      |                       |                                 | Yes              | Yes           | 0         | 0        | 0    | 0        | 0         | 1   |
|                |                   |                 | <i>Doliolum</i>       | <i>Doliolum nationalis</i>      | Yes (6)          | No            | 1         | 0        | 0    | 0        | 0         | 0   |
