# Supplementary material for: Marine environmental DNA biomonitoring reveals seasonal patterns in biodiversity and identifies ecosystem responses to anomalous climatic events
Source: PubMed Central journal article supplement (PMC6368286; doi:10.1371/journal.pgen.1007943), 2019-02-08
Supplement: pgen.1007943.s004.pdf [file pgen.1007943.s004.pdf]

**Table S4:** Number of Mollusca detections in Rottneest Island zooplankton samples by each assay.

| Class                           | Order             | Family         | Genus                 | Species                      | In Australia<br>[5] | Rottneest<br>[5] | Copepod<br>3 | Cnidaria | Mollusca | Copepod<br>2 | Copepod<br>1 | 18S |
|---------------------------------|-------------------|----------------|-----------------------|------------------------------|---------------------|------------------|--------------|----------|----------|--------------|--------------|-----|
| Bivalvia                        | Ostreida          | Ostreidae      |                       |                              | Yes                 | Yes              | 0            | 1        | 0        | 0            | 0            | 0   |
|                                 |                   | Pinnidae       |                       |                              | Yes                 | Yes              | 0            | 0        | 1        | 0            | 0            | 0   |
|                                 | Pterioida (ALA)   |                |                       |                              | Yes                 | No               | 0            | 0        | 2        | 0            | 0            | 0   |
| Cephalopoda                     | Decapodiformes    | Idiosepiidae   |                       |                              | Yes                 | Yes              | 0            | 0        | 1        | 0            | 0            | 0   |
| Gastropoda -<br>Hypsogastropoda |                   |                |                       |                              | Yes                 | Yes              | 0            | 0        | 0        | 0            | 14           | 0   |
| Gastropoda                      |                   |                |                       |                              | Yes                 | Yes              | 0            | 0        | 0        | 0            | 6            | 4   |
|                                 |                   | Acteonidae     | <i>Pupa</i>           |                              | Yes                 | Yes              | 0            | 0        | 1        | 0            | 0            | 0   |
|                                 |                   | Aplustridae    | <i>Micromelo</i>      | <i>Micromelo undatus</i>     | Yes                 | No               | 0            | 1        | 0        | 0            | 1            | 0   |
|                                 |                   | Lepetidae      |                       |                              | Yes                 | No               | 1            | 0        | 0        | 0            | 0            | 0   |
|                                 |                   | Lottiidae      |                       |                              | Yes                 | Yes              | 1            | 0        | 0        | 0            | 0            | 0   |
|                                 |                   | Pyramidellidae | <i>Cingulina</i>      |                              | Yes                 | Yes              | 0            | 0        | 1        | 0            | 0            | 0   |
|                                 | Anaspidea         | Aplysiidae     |                       |                              | Yes                 | Yes              | 0            | 0        | 3        | 0            | 0            | 0   |
|                                 |                   |                | <i>Aplysia</i>        | <i>Aplysia gigantea</i>      | Yes                 | Yes              | 0            | 0        | 2        | 0            | 0            | 0   |
|                                 |                   |                | <i>Dolabella</i>      | <i>Dolabella auricularia</i> | Yes                 | Yes              | 0            | 1        | 0        | 0            | 0            | 0   |
|                                 | Cephalaspidea     | Bullidae       | <i>Bulla</i>          | <i>Bulla quoyii</i>          | Yes                 | Yes              | 0            | 0        | 4        | 0            | 0            | 0   |
|                                 | Caenogastropoda   |                |                       |                              | Yes                 | Yes              | 0            | 0        | 0        | 0            | 5            | 2   |
|                                 |                   |                |                       | <i>Cacozeliana granarium</i> | Yes                 | Yes              | 0            | 0        | 24       | 0            | 1            | 0   |
|                                 |                   | Cerithiidae    | <i>Cacozeliana</i>    | <i>granarium</i>             | Yes                 | Yes              | 0            | 0        | 24       | 0            | 1            | 0   |
|                                 |                   | Newtoniellidae | <i>Ataxocerithium</i> |                              | Yes                 | Yes              | 10           | 0        | 0        | 5            | 14           | 0   |
|                                 |                   | Potamididae    |                       |                              | Yes                 | Yes              | 1            | 0        | 0        | 0            | 0            | 0   |
|                                 | Cephalaspidea     | Aglajidae      |                       |                              | Yes                 | Yes              | 0            | 0        | 1        | 0            | 0            | 2   |
|                                 | Cycloneritimorpha |                |                       |                              | Yes                 | Yes              | 0            | 0        | 0        | 2            | 0            | 0   |
|                                 |                   | Neritidae      |                       |                              | Yes                 | Yes              | 3            | 0        | 0        | 0            | 0            | 0   |
|                                 | Littorinimorpha   |                |                       |                              | Yes                 | Yes              | 0            | 0        | 0        | 9            | 3            | 0   |
|                                 |                   | Bursidae       |                       |                              | Yes                 | Yes              | 1            | 0        | 0        | 0            | 0            | 0   |
|                                 |                   |                | <i>Bursina</i>        |                              | Yes                 | No               | 1            | 0        | 0        | 0            | 0            | 0   |
|                                 |                   | Calyptraeidae  |                       |                              | Yes                 | Yes              | 1            | 0        | 0        | 0            | 0            | 0   |
|                                 |                   | Cassidae       |                       |                              | Yes                 | Yes              | 0            | 0        | 1        | 0            | 0            | 0   |
|                                 |                   |                | <i>Semicassis</i>     |                              | Yes                 | Yes              | 1            | 0        | 0        | 0            | 0            | 0   |

| Class | Order               | Family           | Genus                 | Species                       | In Australia<br>[5] | Rottneest<br>[5] | Copepod<br>3 | Cnidaria | Mollusca | Copepod<br>2 | Copepod<br>1 | 18S |
|-------|---------------------|------------------|-----------------------|-------------------------------|---------------------|------------------|--------------|----------|----------|--------------|--------------|-----|
|       |                     | Cypræidae        | <i>Erosaria</i>       | <i>Erosaria cernica</i>       | Yes                 | Yes              | 0            | 2        | 0        | 0            | 0            | 0   |
|       |                     |                  | <i>Staphylaea</i>     | <i>Staphylaea limacina</i>    | Yes                 | No               | 0            | 0        | 0        | 0            | 1            | 0   |
|       |                     | Hipponicidae     | <i>Antisabia</i>      | <i>Antisabia foliacea</i>     | Yes                 | Yes              | 1            | 0        | 4        | 0            | 0            | 0   |
|       |                     | Naticidae        | <i>Conuber</i>        |                               | Yes                 | Yes              | 0            | 0        | 0        | 0            | 1            | 0   |
|       |                     | Rissoinidae      | <i>Phosinella</i>     | <i>Phosinella clathrata</i>   | Yes                 | No               | 0            | 0        | 0        | 0            | 0            | 1   |
|       |                     | Strombidae       |                       |                               | Yes                 | Yes              | 0            | 0        | 0        | 1            | 0            | 0   |
|       |                     |                  | <i>Canarium</i>       | <i>Canarium mutabile</i>      | Yes                 | Yes              | 0            | 0        | 0        | 0            | 1            | 0   |
|       |                     | Triviidae        | <i>Ellatrivia</i>     | <i>Ellatrivia merces</i>      | Yes                 | Yes              | 0            | 0        | 0        | 0            | 1            | 0   |
|       | Neogastropoda       |                  |                       |                               | Yes                 | Yes              | 0            | 0        | 1        | 2            | 6            | 1   |
|       |                     | Buccinidae       |                       |                               | Yes                 | Yes              | 2            | 0        | 2        | 0            | 0            | 0   |
|       |                     |                  | <i>Lirabuccinum</i>   |                               | No                  | No               | 8            | 0        | 0        | 0            | 0            | 0   |
|       |                     |                  |                       | <i>Lirabuccinum dirum</i>     | No                  | No               | 1            | 0        | 0        | 0            | 0            | 0   |
|       |                     | Columbellidae    |                       |                               | Yes                 | Yes              | 1            | 0        | 2        | 0            | 0            | 0   |
|       |                     | Conidae          |                       |                               | Yes                 | Yes              | 1            | 0        | 0        | 0            | 0            | 0   |
|       |                     |                  | <i>Conus</i>          | <i>Conus</i>                  | Yes                 | Yes              | 0            | 0        | 0        | 0            | 2            | 0   |
|       |                     |                  |                       | <i>Conus klemae</i>           | Yes                 | Yes              | 1            | 0        | 1        | 0            | 2            | 0   |
|       |                     | Mitridae         | <i>Mitra</i>          | <i>Mitra cucumerina</i>       | Yes                 | No               | 0            | 0        | 0        | 0            | 1            | 0   |
|       |                     | Muricidae        |                       |                               | Yes                 | Yes              | 23           | 0        | 1        | 1            | 1            | 0   |
|       |                     |                  | <i>Cronia</i>         |                               | Yes                 | Yes              | 0            | 0        | 1        | 2            | 0            | 0   |
|       |                     |                  | <i>Dicathais</i>      | <i>Dicathais orbita</i>       | Yes                 | Yes              | 0            | 0        | 2        | 0            | 3            | 0   |
|       | Nudibranchia        |                  |                       |                               | Yes                 | Yes              | 0            | 10       | 2        | 1            | 2            | 0   |
|       |                     | Chromodorididae  |                       |                               | Yes                 | Yes              | 0            | 1        | 0        | 0            | 0            | 0   |
|       |                     |                  | <i>Ceratosoma</i>     | <i>Ceratosoma amoenum</i>     | Yes                 | Yes              | 0            | 2        | 1        | 0            | 0            | 0   |
|       |                     |                  | <i>Chromodoris</i>    | <i>Chromodoris striatella</i> | Yes                 | No               | 0            | 6        | 1        | 0            | 0            | 0   |
|       |                     | Dotidae          | <i>Doto</i>           |                               | Yes                 | Yes              | 0            | 0        | 1        | 0            | 0            | 0   |
|       |                     | Eubranchidae     |                       |                               | Yes                 | No               | 0            | 0        | 0        | 0            | 1            | 0   |
|       |                     | Tergipedidae     |                       |                               | Yes                 | Yes              | 0            | 0        | 0        | 0            | 2            | 0   |
|       | Pleurobranchomorpha | Pleurobranchidae |                       |                               | Yes                 | Yes              | 0            | 0        | 1        | 0            | 0            | 0   |
|       |                     |                  | <i>Pleurobranchus</i> | <i>Pleurobranchus hilli</i>   | Yes                 | Yes              | 0            | 3        | 0        | 0            | 0            | 0   |

| Class          | Order       | Family        | Genus            | Species              | In Australia<br>[5] | Rottneest<br>[5] | Copepod<br>3 | Cnidaria | Mollusca | Copepod<br>2 | Copepod<br>1 | 18S |
|----------------|-------------|---------------|------------------|----------------------|---------------------|------------------|--------------|----------|----------|--------------|--------------|-----|
|                | Sacoglossa  |               |                  |                      | Yes                 | Yes              | 0            | 1        | 0        | 0            | 0            | 0   |
|                |             | Limapontiidae |                  |                      | Yes                 | Yes              | 0            | 0        | 1        | 0            | 0            | 0   |
|                | Thecosomata |               |                  |                      | Yes                 | Yes              | 0            | 1        | 1        | 0            | 0            | 0   |
|                |             | Creseidae     |                  |                      | Yes                 | No               | 0            | 0        | 11       | 0            | 0            | 0   |
|                |             |               | <i>Creseis</i>   |                      | Yes                 | No               | 0            | 1        | 18       | 0            | 0            | 4   |
|                |             |               |                  | <i>Creseis clava</i> | No                  | No               | 0            | 0        | 1        | 0            | 0            | 0   |
|                |             | Cuvierinidae  | <i>Cuvierina</i> |                      | Yes                 | Yes              | 0            | 1        | 0        | 0            | 0            | 0   |
| Polyplacophora | Chitonida   | Mopaliidae    |                  |                      | Yes                 | Yes              | 2            | 0        | 0        | 0            | 0            | 0   |
