# Supplementary material for: Marine environmental DNA biomonitoring reveals seasonal patterns in biodiversity and identifies ecosystem responses to anomalous climatic events
Source: PubMed Central journal article supplement (PMC6368286; doi:10.1371/journal.pgen.1007943), 2019-02-08
Supplement: pgen.1007943.s005.pdf [file pgen.1007943.s005.pdf]

**Table S5:** Number of Cnidaria detections in Rottneest Island zooplankton samples by each assay.

| Class    | Order         | Family          | Genus                | Species                   | In Australia [5]               | Rottneest [5] | Copepod 3 | Cnidaria | Crust | Mollusca | 18S |   |
|----------|---------------|-----------------|----------------------|---------------------------|--------------------------------|---------------|-----------|----------|-------|----------|-----|---|
| Anthozoa | Actinaria     |                 |                      |                           | Yes                            | Yes           | 3         | 0        | 0     | 2        | 1   |   |
|          | Pennatulacea  | Virgulariidae   | <i>Stylatula</i>     | <i>Stylatula elongata</i> | No                             | No            | 0         | 1        | 0     | 1        | 0   |   |
|          | Scleractinia  | Caryophylliidae |                      |                           | Yes                            | Yes           | 1         | 0        | 0     | 0        | 0   |   |
|          | Zoantharia    |                 |                      |                           | Yes                            | Yes           | 1         | 1        | 0     | 3        | 0   |   |
|          |               | Zoanthidae      |                      |                           | Yes                            | Yes           | 0         | 1        | 0     | 1        | 0   |   |
|          |               | Microzoanthidae | <i>Microzoanthus</i> |                           | Yes                            | No            | 0         | 2        | 0     | 0        | 0   |   |
| Hydrozoa |               |                 |                      |                           | Yes                            | Yes           | 0         | 1        | 0     | 0        | 0   |   |
|          | Anthoathecata |                 |                      |                           | Yes                            | Yes           | 0         | 9        | 0     | 0        | 7   |   |
|          |               | Oceaniidae      | <i>Turritopsis</i>   |                           | Yes                            | No            | 0         | 0        | 0     | 11       | 0   |   |
|          |               | Pennariidae     | <i>Pennaria</i>      |                           | Yes                            | Yes           | 0         | 1        | 0     | 0        | 0   |   |
|          |               | Leptothecata    |                      |                           | Yes                            | Yes           | 0         | 7        | 0     | 0        | 0   |   |
|          |               |                 | Campanulariidae      |                           | Yes                            | Yes           | 0         | 9        | 0     | 1        | 0   |   |
|          |               |                 |                      | <i>Clytia</i>             | Yes                            | Yes           | 0         | 1        | 0     | 4        | 0   |   |
|          |               |                 |                      | <i>Obelia</i>             | Yes                            | Yes           | 0         | 1        | 0     | 0        | 0   |   |
|          |               |                 | Eirenidae            | <i>Eirene</i>             | Yes                            | No            | 0         | 0        | 0     | 1        | 0   |   |
|          |               |                 | Plumulariidae        |                           | Yes                            | Yes           | 0         | 0        | 0     | 1        | 0   |   |
|          |               |                 | Thyroscyphidae       | <i>Thyroscyphus</i>       | <i>Thyroscyphus ramosus</i>    | No            | No        | 0        | 0     | 0        | 0   | 1 |
|          |               | Narcomedusae    | Cuninidae            | <i>Cunina</i>             | Yes                            | No            | 0         | 0        | 0     | 1        | 0   |   |
|          |               | Siphonophorae   |                      |                           | Yes                            | Yes           | 0         | 3        | 0     | 0        | 2   |   |
|          |               |                 | Abylidae             | <i>Abylopsis</i>          | <i>Abylopsis eschscholtzii</i> | No            | No        | 0        | 1     | 0        | 0   | 0 |
|          |               |                 |                      | <i>Bassia</i>             | <i>Bassia bassensis</i>        | No            | No        | 0        | 17    | 0        | 0   | 0 |
|          |               |                 | Agalmatidae          |                           |                                | Yes           | No        | 0        | 2     | 0        | 2   | 0 |
|          |               |                 |                      | <i>Athorybia</i>          | <i>Athorybia rosacea</i>       | No            | No        | 0        | 1     | 0        | 0   | 0 |
|          |               |                 |                      | <i>Nanomia</i>            |                                | Yes           | No        | 0        | 3     | 0        | 0   | 0 |
|          |               |                 |                      |                           | <i>Nanomia bijuga</i>          | No            | No        | 2        | 0     | 0        | 0   | 1 |
|          |               |                 | Cordagalmatidae      | <i>Cordagalma</i>         | <i>Cordagalma ordinatum</i>    | No            | No        | 0        | 0     | 0        | 0   | 1 |
|          |               | Diphyidae       |                      |                           | Yes                            | Yes           | 0         | 2        | 0     | 0        | 0   |   |
|          |               |                 | <i>Lensia</i>        |                           | No                             | No            | 0         | 2        | 0     | 0        | 0   |   |
|          |               |                 |                      | <i>Lensia campanella</i>  | No                             | No            | 1         | 0        | 0     | 0        | 0   |   |
|          |               |                 |                      | <i>Lensia subtiloides</i> | No                             | No            | 0         | 4        | 0     | 21       | 0   |   |

| Class     | Order         | Family           | Genus                | Species                         | In Australia [5] | Rottnest [5] | Copepod 3 | Cnidaria | Crust | Mollusca | 18S |
|-----------|---------------|------------------|----------------------|---------------------------------|------------------|--------------|-----------|----------|-------|----------|-----|
|           |               | Sphaeronectidae  | <i>Sphaeronectes</i> | <i>Sphaeronectes koellikeri</i> | No               | No           | 0         | 33       | 0     | 4        | 0   |
|           | Trachymedusae | Geryoniidae      |                      |                                 | Yes              | Yes          | 0         | 0        | 1     | 0        | 2   |
|           |               |                  | <i>Geryonia</i>      | <i>Geryonia proboscidalis</i>   | Yes              | No           | 1         | 0        | 0     | 0        | 0   |
|           |               |                  | <i>Liriope</i>       |                                 | Yes              | No           | 0         | 2        | 0     | 0        | 0   |
|           |               |                  |                      | <i>Liriope tetraphylla</i>      | Yes              | No           | 27        | 0        | 0     | 0        | 0   |
|           |               | Rhopalonematidae | <i>Aglaura</i>       | <i>Aglaura hemistoma</i>        | Yes              | No           | 0         | 11       | 0     | 0        | 0   |
| Myxozoa   | Bivalvulida   | Myxidiidae       |                      |                                 | Yes              | No           | 0         | 0        | 0     | 0        | 1   |
| Scyphozoa | Semaestomeae  | Pelagiidae       | <i>Chrysaora</i>     |                                 | Yes              | Yes          | 0         | 1        | 0     | 1        | 1   |
