# Supplementary material for: Marine environmental DNA biomonitoring reveals seasonal patterns in biodiversity and identifies ecosystem responses to anomalous climatic events
Source: PubMed Central journal article supplement (PMC6368286; doi:10.1371/journal.pgen.1007943), 2019-02-08
Supplement: pgen.1007943.s006.pdf [file pgen.1007943.s006.pdf]

**Table S6:** Number of Echinodermata detections in Rottneest Island zooplankton samples by each assay.

| Class                  | Order           | Family          | Genus               | Species                         | In Australia [5] | Rottneest [5] | Copepod 3 | Cnidaria | Crust | Mollusca | Copepod 2 | 18S |
|------------------------|-----------------|-----------------|---------------------|---------------------------------|------------------|---------------|-----------|----------|-------|----------|-----------|-----|
| Asteroidea             | Velatida        |                 |                     |                                 | Yes              | Yes           | 0         | 1        | 0     | 0        | 0         | 0   |
| Crinoidea              | Comatulida      |                 |                     |                                 | Yes              | Yes           | 0         | 2        | 0     | 0        | 0         | 0   |
|                        |                 | Antedonidae     |                     |                                 | Yes              | Yes           | 0         | 0        | 0     | 2        | 0         | 0   |
| Echinoidea - Echinacea |                 |                 |                     |                                 | Yes              | Yes           | 0         | 0        | 0     | 0        | 0         | 1   |
| Echinodea              | Camarodonta     | Echinometridae  | <i>Echinometra</i>  | <i>Echinometra mathaei</i>      | Yes              | Yes           | 0         | 2        | 0     | 2        | 0         | 0   |
|                        |                 | Temnopleuridae  |                     |                                 | Yes              | Yes           | 0         | 0        | 0     | 0        | 2         | 1   |
|                        |                 |                 | <i>Temnopleurus</i> | <i>Temnopleurus michaelseni</i> | Yes              | Yes           | 10        | 12       | 0     | 5        | 5         | 0   |
|                        | Clypeasteroidea |                 |                     |                                 | Yes              | Yes           | 0         | 3        | 0     | 0        | 0         | 0   |
|                        | Spatangoida     |                 |                     |                                 | Yes              | Yes           | 0         | 8        | 0     | 2        | 0         | 0   |
|                        |                 | Loveniidae      |                     |                                 | Yes              | Yes           | 0         | 1        | 0     | 0        | 0         | 0   |
| Ophiuroidea            | Ophiurida       |                 |                     |                                 | Yes              | Yes           | 0         | 2        | 0     | 0        | 0         | 1   |
|                        |                 | Amphiuridae     | <i>Amphipholis</i>  |                                 | Yes              | Yes           | 0         | 0        | 2     | 0        | 0         | 0   |
|                        |                 | Ophionereididae | <i>Ophionereis</i>  | <i>Ophionereis schayeri</i>     | Yes              | Yes           | 0         | 2        | 0     | 0        | 0         | 0   |
