# Supplementary material for: Marine environmental DNA biomonitoring reveals seasonal patterns in biodiversity and identifies ecosystem responses to anomalous climatic events
Source: PubMed Central journal article supplement (PMC6368286; doi:10.1371/journal.pgen.1007943), 2019-02-08
Supplement: pgen.1007943.s007.pdf [file pgen.1007943.s007.pdf]

**Table S7:** Number of other Animalia taxa detections in Rottneest Island zooplankton samples by each assay.

| Phyla           | Class         | Order           | Family              | Genus                    | Species                        | Australia<br>[5]                     | Rottneest<br>[5] | Copepod<br>3 | Cnidaria | Crust | Mollusca | Copepod<br>2 | Copepod<br>1 | 18S |
|-----------------|---------------|-----------------|---------------------|--------------------------|--------------------------------|--------------------------------------|------------------|--------------|----------|-------|----------|--------------|--------------|-----|
| Annelida        | Polychaeta    | Echiuroidea     | Bonelliidae         | <i>Bonellia</i>          |                                | Yes                                  | Yes              | 0            | 0        | 0     | 1        | 0            | 0            | 0   |
|                 |               | Phyllodocida    |                     |                          |                                | Yes                                  | Yes              | 1            | 2        | 0     | 3        | 0            | 0            | 1   |
|                 |               | Spionida        | Spionidae           |                          |                                | Yes                                  | Yes              | 0            | 0        | 0     | 0        | 0            | 0            | 0   |
| Bryozoa         | Gymnolaemata  | Cheilostomata   | Candidae            | <i>Tricellaria (ALA)</i> |                                | Yes                                  | No               | 0            | 0        | 1     | 0        | 0            | 0            | 0   |
|                 |               | Membraniporidae |                     | <i>Biflustra</i>         |                                | Yes                                  | Yes              | 0            | 0        | 0     | 2        | 0            | 0            | 0   |
|                 |               | Watersiporidae  |                     | <i>Watersipora</i>       | <i>Watersipora cucullata</i>   | Yes                                  | No               | 0            | 0        | 0     | 2        | 0            | 0            | 0   |
|                 |               | Ctenostomatida  | Flustrellidridae    | <i>Flustrellidra</i>     | <i>Flustrellidra armata</i>    | No                                   | No               | 1            | 0        | 0     | 0        | 1            | 2            | 0   |
| Chaetognatha    | Sagittoidea   | Aphragmophora   | Sagittidae          |                          |                                | Yes                                  | Yes              | 0            | 1        | 0     | 0        | 0            | 0            | 7   |
|                 |               |                 |                     | <i>Aidanosagitta</i>     | <i>Aidanosagitta neglecta</i>  | Yes                                  | Yes              | 0            | 0        | 0     | 0        | 0            | 0            | 2   |
|                 |               |                 |                     | <i>Sagitta</i>           |                                | Yes                                  | Yes              | 1            | 0        | 0     | 2        | 0            | 2            | 0   |
|                 |               |                 |                     |                          | <i>Sagitta bipunctata</i>      | Yes                                  | Yes              | 0            | 0        | 0     | 0        | 0            | 2            | 0   |
| Ctenophora      | Nuda          | Berioda         | Beroidae            | <i>Beroe</i>             | Yes                            | No                                   | 0                | 0            | 0        | 0     | 0        | 0            | 1            |     |
| Porifera        | Demospongiae  |                 |                     |                          |                                | Yes                                  | Yes              | 0            | 1        | 0     | 0        | 0            | 0            | 0   |
|                 |               | Axinellida      | Axinellidae         |                          |                                | Yes                                  | Yes              | 0            | 1        | 0     | 0        | 0            | 0            | 0   |
|                 |               | Bubarida        | Dictyonellidae      | <i>Acanthella</i>        |                                | Yes                                  | Yes              | 0            | 1        | 0     | 0        | 0            | 0            | 0   |
|                 |               | Clionaida       | Clionidae           | <i>Cliona</i>            | <i>Cliona jullieni</i>         | No                                   | No               | 0            | 0        | 0     | 3        | 0            | 0            | 0   |
|                 |               | Dendroceratida  | Darwinellidae       | <i>Dendrilla</i>         |                                | Yes                                  | Yes              | 1            | 0        | 0     | 0        | 0            | 0            | 0   |
|                 |               | Poecilosclerida |                     |                          |                                | Yes                                  | Yes              | 1            | 1        | 0     | 1        | 0            | 0            | 1   |
|                 |               |                 | Hymedesmiidae       | <i>Phorbas</i>           |                                | Yes                                  | Yes              | 0            | 0        | 0     | 1        | 0            | 0            | 0   |
|                 |               |                 | Microcionidae       | <i>Clathria</i>          |                                | Yes                                  | Yes              | 0            | 0        | 0     | 1        | 0            | 0            | 0   |
|                 |               |                 |                     | <i>Ophlitaspongia</i>    | <i>Ophlitaspongia papilla</i>  | No                                   | No               | 0            | 0        | 0     | 1        | 0            | 0            | 0   |
|                 |               |                 | Tetractinellida     | Ancorinidae              | <i>Stelletta</i>               |                                      | Yes              | Yes          | 0        | 1     | 0        | 0            | 0            | 0   |
|                 |               |                 |                     |                          |                                | <i>Stellettinopsis megastylifera</i> | No               | No           | 0        | 1     | 0        | 0            | 0            | 0   |
|                 |               | Geodiinae       | <i>Geodia</i>       |                          | Yes                            | Yes                                  | 0                | 1            | 0        | 0     | 0        | 0            |              |     |
| Nemertea        | Anopla        | Paleonemertea   |                     |                          |                                | No                                   | No               | 0            | 0        | 0     | 0        | 0            | 1            | 0   |
|                 |               |                 |                     | Lineidae                 |                                |                                      | Yes              | No           | 3        | 0     | 0        | 0            | 0            | 0   |
|                 | Enopla        | Monostilifera   | Amphiporidae        |                          |                                | Yes                                  | No               | 1            | 0        | 0     | 0        | 0            | 0            | 0   |
|                 |               | Polystilifera   | Paradrepanophoridae |                          |                                | No                                   | No               | 0            | 2        | 0     | 0        | 0            | 0            | 0   |
|                 | Paleonemertea |                 |                     |                          |                                | No                                   | No               | 0            | 0        | 0     | 0        | 0            | 1            | 0   |
| Platyhelminthes | Rhabditophora | Polycladida     | Cephalothricidae    | <i>Cephalothrix</i>      | <i>Cephalothrix filiformis</i> | No                                   | No               | 0            | 0        | 0     | 0        | 0            | 0            | 1   |
|                 | Trematoda     | Plagiorchiida   | Didymozoidae        | <i>Didymozoon</i>        |                                | Yes                                  | Yes              | 0            | 8        | 0     | 1        | 0            | 0            | 0   |
|                 |               |                 |                     |                          |                                | No                                   | No               | 0            | 0        | 0     | 0        | 0            | 0            | 1   |

| Phyla     | Class             | Order            | Family            | Genus            | Species                                                       | Australia<br>[5] | Rottneest<br>[5] | Copepod<br>3 | Cnidaria | Crust | Mollusca | Copepod<br>2 | Copepod<br>1 | 18S |
|-----------|-------------------|------------------|-------------------|------------------|---------------------------------------------------------------|------------------|------------------|--------------|----------|-------|----------|--------------|--------------|-----|
| Sipuncula | Phascolosomatidea | Phascolosomatida | Phascolosomatidae | <i>Apionsoma</i> | <i>Apionsoma</i><br>( <i>Apionsoma</i> )<br><i>misakianum</i> | Yes              | No               | 0            | 0        | 0     | 0        | 0            | 0            | 1   |
