# Supplementary material for: Marine environmental DNA biomonitoring reveals seasonal patterns in biodiversity and identifies ecosystem responses to anomalous climatic events
Source: PubMed Central journal article supplement (PMC6368286; doi:10.1371/journal.pgen.1007943), 2019-02-08
Supplement: pgen.1007943.s008.pdf [file pgen.1007943.s008.pdf]

**Table S8:** Pairwise analysis of seasonal OTU richness & assemblage, t statistics included for significant results (t)—PERMANOVA+[7].

| <b>Assay</b> | <b>OTU diversity test</b> | <b>Summer Spring</b> | <b>Summer Winter</b> | <b>Summer Autumn</b> | <b>Spring Winter</b> | <b>Spring Autumn</b> | <b>Winter Autumn</b> |
|--------------|---------------------------|----------------------|----------------------|----------------------|----------------------|----------------------|----------------------|
| Cnidaria     | Richness                  | -                    | -                    | -                    | -                    | -                    | -                    |
|              | Assemblage                | * HB t=1.34          | *** HB t=2.02        | ** HB t=1.45         | *** HB t=1.62        | *** HB t=1.55        | ** HB t=1.40         |
| Copepod 1    | Richness                  | -                    | -                    | -                    | -                    | -                    | -                    |
|              | Assemblage                | * t=1.28             | *** HB t=1.85        | *** HB t= 1.69       | ** HB t=1.61         | *** HB t=1.71        | -                    |
| Copepod 2    | Richness                  | -                    | * t=2.48             | -                    | -                    | -                    | -                    |
|              | Assemblage                | -                    | *** HB t=2.10        | -                    | *** HB t=1.95        | ** HB t=1.61         | -                    |
| Copepod 3    | Richness                  | -                    | -                    | -                    | -                    | -                    | -                    |
|              | Assemblage                | * t=1.35             | *** HB t=2.13        | * HB t=1.53          | *** HB t=2.12        | *** HB t=1.90        | -                    |
| Crustacea    | Richness                  | * t=2.13             | -                    | -                    | * =1.76              | -                    | -                    |
|              | Assemblage                | ** HB t=1.49         | *** HB t=1.76        | * HB t=1.40          | ** HB t=1.54         | *** HB t=1.60        | * HB t=1.36          |
| Fish         | Richness                  | -                    | *** HB t=5.03        | *** HB t= 3.89       | *** HB t= 4.18       | ** HB t= 3.25        | -                    |
|              | Assemblage                | ** HB t=1.61         | *** HB t=2.20        | ** HB t=1.73         | *** HB t= 2.43       | *** HB t=2.23        | *** HB t=2.02        |
| Mollusca     | Richness                  | -                    | -                    | -                    | -                    | -                    | -                    |
|              | Assemblage                | * HB t=1.31          | *** HB t=2.37        | ** HB t=1.55         | *** HB t=1.93        | *** HB t=1.55        | *** HB t=1.73        |
| Universal    | Richness                  | -                    | -                    | -                    | -                    | -                    | -                    |
|              | Assemblage                | * t=1.41             | *** HB t=1.87        | * t=1.54             | ** HB t=1.59         | * t=1.43             | * t=1.40             |

Where \*\*\* is  $p \leq .001$ , \*\* is  $p \leq .01$ , \* is  $p \leq .05$ , <sup>HB</sup> is significant with Holm-Bonferroni correction & - is no significant changes
