# Supplementary material for: Marine environmental DNA biomonitoring reveals seasonal patterns in biodiversity and identifies ecosystem responses to anomalous climatic events
Source: PubMed Central journal article supplement (PMC6368286; doi:10.1371/journal.pgen.1007943), 2019-02-08
Supplement: pgen.1007943.s009.pdf [file pgen.1007943.s009.pdf]

**Table S9:** Indicator species analysis for seasonal variation—*Indval* [8]

| Season | Assay     | OTU | Taxa                              | Indicator value | <i>p</i> value |
|--------|-----------|-----|-----------------------------------|-----------------|----------------|
| Spring | Fish      | 6   | Labridae (two – 96%)              | 0.6400          | 0.001          |
| Spring | Universal | 37  | Hexanauplia                       | 0.4139          | 0.001          |
| Spring | Copepod 3 | 125 | Perciformes                       | 0.3483          | 0.004          |
| Spring | Cnidaria  | 152 | Plantae                           | 0.3217          | 0.007          |
| Spring | Copepod 3 | 242 | <i>Clausocalanus pergens</i> (v)  | 0.3195          | 0.017          |
| Spring | Fish      | 12  | <i>Austrolabrus maculatus</i>     | 0.3176          | 0.012          |
| Spring | Copepod 3 | 186 | <i>Bestiolina</i> sp              | 0.3150          | 0.020          |
| Spring | Mollusca  | 43  | Mullidae                          | 0.3148          | 0.008          |
| Spring | Copepod 2 | 40  | Hexanauplia                       | 0.3006          | 0.014          |
| Spring | Copepod 3 | 115 | Paracalanidae                     | 0.2950          | 0.011          |
| Spring | Cnidaria  | 18  | Arthropoda                        | 0.2948          | 0.045          |
| Spring | Fish      | 11  | <i>Upeneichthys stotti</i>        | 0.2904          | 0.017          |
| Spring | Copepod 3 | 2   | <i>Bestiolina</i> sp.             | 0.2833          | 0.025          |
| Spring | Copepod 3 | 166 | <i>Bestiolina</i> sp.             | 0.2816          | 0.017          |
| Spring | Copepod 1 | 82  | <i>Dicathais orbita</i> (v)       | 0.2708          | 0.011          |
| Spring | Copepod 3 | 303 | Labridae                          | 0.2667          | 0.005          |
| Spring | Cnidaria  | 38  | Leptothecata                      | 0.2667          | 0.010          |
| Spring | Copepod 3 | 128 | <i>Evadne spinifera</i> (v)       | 0.2659          | 0.038          |
| Spring | Cnidaria  | 37  | Echinoidea                        | 0.2430          | 0.043          |
| Spring | Mollusca  | 202 | Animalia                          | 0.2299          | 0.022          |
| Spring | Mollusca  | 251 | Anopla                            | 0.2286          | 0.033          |
| Spring | Copepod 1 | 41  | Gastropoda                        | 0.2133          | 0.026          |
| Spring | Crustacea | 36  | Arthropoda                        | 0.2083          | 0.033          |
| Spring | Mollusca  | 245 | <i>Centropages violaceus</i> (v)  | 0.2000          | 0.048          |
| Spring | Cnidaria  | 214 | Phyllococida.                     | 0.2000          | 0.050          |
| Spring | Cnidaria  | 69  | Cnidaria                          | 0.1778          | 0.047          |
| Summer | Copepod 3 | 22  | <i>Calcinus dapsiles</i>          | 0.6661          | 0.001          |
| Summer | Crustacea | 16  | <i>Calcinus dapsiles</i>          | 0.4952          | 0.001          |
| Summer | Cnidaria  | 13  | <i>Evadne spinifera</i> (v)       | 0.4535          | 0.001          |
| Summer | Mollusca  | 3   | <i>Evadne spinifera</i> (v)       | 0.4258          | 0.001          |
| Summer | Copepod 3 | 296 | Calanidae                         | 0.4000          | 0.002          |
| Summer | Cnidaria  | 17  | <i>Etrumeus jacksoniensis</i>     | 0.3786          | 0.001          |
| Summer | Mollusca  | 93  | Arthropoda                        | 0.3752          | 0.004          |
| Summer | Cnidaria  | 34  | Chlorophyta                       | 0.3663          | 0.004          |
| Summer | Mollusca  | 88  | Malacostraca                      | 0.3661          | 0.003          |
| Summer | Mollusca  | 109 | Malacostraca                      | 0.3607          | 0.002          |
| Summer | Cnidaria  | 91  | <i>Chromodoris</i> sp.            | 0.3510          | 0.004          |
| Summer | Copepod 1 | 109 | <i>Triconia</i> sp.               | 0.3437          | 0.005          |
| Summer | Mollusca  | 263 | <i>Chromodoris striatella</i> (v) | 0.3355          | 0.006          |
| Summer | Fish      | 37  | <i>Chromis</i> sp.                | 0.3333          | 0.004          |
| Summer | Cnidaria  | 15  | Arthropoda                        | 0.3298          | 0.016          |
| Summer | Cnidaria  | 10  | Animalia                          | 0.3283          | 0.006          |
| Summer | Mollusca  | 257 | Animalia                          | 0.3242          | 0.009          |
| Summer | Copepod 3 | 194 | Arthropoda                        | 0.3169          | 0.006          |
| Summer | Copepod 1 | 34  | <i>Triconia</i> sp.               | 0.3169          | 0.007          |
| Summer | Cnidaria  | 14  | Hydrozoa                          | 0.3029          | 0.033          |
| Summer | Mollusca  | 179 | Hexanauplia                       | 0.2889          | 0.009          |

| Season | Assay     | OTU | Taxa                                    | Indicator value | p value |
|--------|-----------|-----|-----------------------------------------|-----------------|---------|
| Summer | Mollusca  | 184 | Hydrozoa                                | 0.2877          | 0.024   |
| Summer | Mollusca  | 247 | <i>Trachurus sp.</i> (Two at 100% (v)). | 0.2778          | 0.015   |
| Summer | Mollusca  | 97  | Podonidae                               | 0.2751          | 0.036   |
| Summer | Mollusca  | 106 | Rhodophyta                              | 0.2716          | 0.019   |
| Summer | Mollusca  | 5   | <i>Cliona jullieni</i>                  | 0.2708          | 0.012   |
| Summer | Cnidaria  | 86  | Alveolata                               | 0.2683          | 0.033   |
| Summer | Mollusca  | 54  | Biemnidae (Two at 100% (v))             | 0.2667          | 0.012   |
| Summer | Mollusca  | 343 | Arthropoda                              | 0.2667          | 0.017   |
| Summer | Mollusca  | 292 | Arthropoda                              | 0.2595          | 0.016   |
| Summer | Universal | 15  | Eukaryota                               | 0.2579          | 0.015   |
| Summer | Mollusca  | 137 | Calanoida                               | 0.2553          | 0.037   |
| Summer | Mollusca  | 267 | Malacostraca                            | 0.2537          | 0.016   |
| Summer | Crustacea | 45  | Animalia                                | 0.2537          | 0.026   |
| Summer | Cnidaria  | 135 | Chlorophyta                             | 0.2537          | 0.031   |
| Summer | Cnidaria  | 71  | Arthropoda                              | 0.2483          | 0.042   |
| Summer | Copepod 3 | 247 | <i>Actinaria sp.</i> (v)                | 0.2328          | 0.022   |
| Summer | Mollusca  | 84  | Animalia                                | 0.2307          | 0.031   |
| Summer | Mollusca  | 281 | Arthropoda                              | 0.2307          | 0.037   |
| Summer | Mollusca  | 20  | Sapphirinidae                           | 0.2299          | 0.028   |
| Summer | Copepod 3 | 176 | <i>Chromis sp.</i>                      | 0.2133          | 0.028   |
| Summer | Cnidaria  | 46  | <i>Pleurobranchus hilli</i>             | 0.2133          | 0.029   |
| Summer | Mollusca  | 108 | Annelida                                | 0.2133          | 0.031   |
| Summer | Copepod 3 | 59  | <i>Chromis notata</i>                   | 0.2070          | 0.045   |
| Summer | Cnidaria  | 167 | Gastropoda                              | 0.2044          | 0.039   |
| Summer | Fish      | 13  | <i>Chromis notata</i>                   | 0.2032          | 0.044   |
| Summer | Universal | 87  | Chromista                               | 0.1778          | 0.045   |
| Autumn | Mollusca  | 85  | <i>Farranula gibbula</i> (v)            | 0.3858          | 0.002   |
| Autumn | Copepod 3 | 55  | <i>Flaccisagitta enflata</i>            | 0.3844          | 0.001   |
| Autumn | Copepod 3 | 90  | <i>Centropages orsinii</i>              | 0.3757          | 0.002   |
| Autumn | Fish      | 3   | <i>Engraulis sp.</i> (Three at 100%)    | 0.3630          | 0.003   |
| Autumn | Universal | 79  | Sagittidae                              | 0.3611          | 0.003   |
| Autumn | Cnidaria  | 30  | <i>Temnopleurus michaelsoni</i>         | 0.3528          | 0.010   |
| Autumn | Crustacea | 63  | Arthropoda                              | 0.35            | 0.007   |
| Autumn | Crustacea | 34  | Animalia                                | 0.3362          | 0.015   |
| Autumn | Copepod 1 | 122 | <i>Undinula vulgaris</i> (v)            | 0.3326          | 0.005   |
| Autumn | Copepod 1 | 37  | <i>Clausocalanus minor</i>              | 0.3313          | 0.005   |
| Autumn | Cnidaria  | 61  | Prasinophyceae                          | 0.3297          | 0.034   |
| Autumn | Copepod 3 | 293 | Bivalvia                                | 0.3278          | 0.002   |
| Autumn | Crustacea | 30  | Animalia                                | 0.3278          | 0.003   |
| Autumn | Cnidaria  | 184 | Ophiuroidea                             | 0.3278          | 0.005   |
| Autumn | Crustacea | 35  | Animalia                                | 0.3278          | 0.007   |
| Autumn | Universal | 23  | Eukaryota                               | 0.3248          | 0.020   |
| Autumn | Copepod 3 | 122 | <i>Calocalanus pavo</i> (v)             | 0.3159          | 0.016   |
| Autumn | Copepod 3 | 290 | Malacostraca                            | 0.3077          | 0.005   |
| Autumn | Copepod 3 | 104 | Sagittidae                              | 0.3074          | 0.021   |
| Autumn | Mollusca  | 33  | Decapoda                                | 0.3074          | 0.040   |
| Autumn | Copepod 3 | 216 | Copepoda                                | 0.3036          | 0.013   |
| Autumn | Cnidaria  | 117 | Animalia                                | 0.3033          | 0.019   |
| Autumn | Copepod 1 | 97  | Caenogastropoda                         | 0.2984          | 0.014   |

| Season | Assay     | OTU | Taxa                                     | Indicator value | p value |
|--------|-----------|-----|------------------------------------------|-----------------|---------|
| Autumn | Universal | 42  | Sargassaceae (Many at 100%)              | 0.2984          | 0.022   |
| Autumn | Copepod 1 | 125 | <i>Acrocalanus gracilis</i> (v)          | 0.2979          | 0.032   |
| Autumn | Copepod 3 | 139 | <i>Paracalanus</i> sp. (Two at 100%)     | 0.2838          | 0.020   |
| Autumn | Copepod 3 | 266 | Ophiurida                                | 0.2797          | 0.014   |
| Autumn | Crustacea | 74  | Animalia                                 | 0.2767          | 0.010   |
| Autumn | Copepod 3 | 80  | <i>Temnopleurus michaelsoni</i>          | 0.2751          | 0.044   |
| Autumn | Mollusca  | 45  | Animalia                                 | 0.2740          | 0.038   |
| Autumn | Mollusca  | 28  | Animalia                                 | 0.2705          | 0.026   |
| Autumn | Cnidaria  | 23  | Hydrozoa                                 | 0.2530          | 0.022   |
| Autumn | Copepod 3 | 297 | Euralida                                 | 0.2530          | 0.025   |
| Autumn | Copepod 2 | 66  | <i>Centropages orsinii</i>               | 0.2529          | 0.012   |
| Autumn | Crustacea | 12  | Eukaryota                                | 0.2510          | 0.048   |
| Autumn | Mollusca  | 259 | Annelida                                 | 0.2473          | 0.034   |
| Autumn | Copepod 2 | 80  | <i>Acrocalanus</i> sp.                   | 0.2412          | 0.047   |
| Autumn | Copepod 3 | 188 | <i>Sagitta</i> sp.                       | 0.2331          | 0.034   |
| Autumn | Crustacea | 9   | <i>Menaethius</i> sp.                    | 0.2069          | 0.042   |
| Winter | Mollusca  | 68  | <i>Canthocalanus pauper</i>              | 0.4987          | 0.001   |
| Winter | Copepod 3 | 110 | <i>Centropages furcatus</i>              | 0.4952          | 0.001   |
| Winter | Mollusca  | 158 | Poecilostomatoida                        | 0.4710          | 0.001   |
| Winter | Copepod 2 | 19  | Hexanauplia                              | 0.4646          | 0.001   |
| Winter | Mollusca  | 78  | Calanoida                                | 0.4447          | 0.003   |
| Winter | Cnidaria  | 90  | Gastropoda                               | 0.4288          | 0.002   |
| Winter | Mollusca  | 174 | Arthropoda                               | 0.4183          | 0.004   |
| Winter | Mollusca  | 38  | <i>Eucalanus pseudoattenuatus</i> (v)    | 0.4148          | 0.003   |
| Winter | Copepod 1 | 11  | <i>Eucalanus pseudattenuatus</i> (v)     | 0.4088          | 0.002   |
| Winter | Mollusca  | 180 | Arthropoda                               | 0.4050          | 0.001   |
| Winter | Copepod 2 | 18  | Hexanauplia                              | 0.3985          | 0.004   |
| Winter | Copepod 2 | 46  | Crustacea                                | 0.3976          | 0.002   |
| Winter | Mollusca  | 47  | <i>Subeucalanus pileatus</i> (v)         | 0.3965          | 0.005   |
| Winter | Copepod 2 | 55  | <i>Paracalanus</i> sp. (Two at 100%(v))  | 0.3908          | 0.005   |
| Winter | Universal | 91  | Pycnococcaceae (Many at 100%)            | 0.3852          | 0.003   |
| Winter | Copepod 3 | 93  | <i>Paracalanus</i> sp. (Two at 100%(v))  | 0.3824          | 0.002   |
| Winter | Mollusca  | 107 | Calanoida                                | 0.3779          | 0.007   |
| Winter | Copepod 3 | 121 | Sagittidae                               | 0.3777          | 0.008   |
| Winter | Copepod 3 | 83  | <i>Acrocalanus gracilis</i>              | 0.3692          | 0.007   |
| Winter | Mollusca  | 130 | <i>Ecklonia radiata</i>                  | 0.3685          | 0.005   |
| Winter | Universal | 52  | <i>Leptochela</i> sp                     | 0.3592          | 0.001   |
| Winter | Copepod 3 | 138 | Calanoida                                | 0.3552          | 0.005   |
| Winter | Copepod 2 | 5   | <i>Lucicutia flavicornis</i> (v)         | 0.3540          | 0.009   |
| Winter | Copepod 2 | 44  | <i>Eucalanus pseudattenuatus</i> (v)     | 0.3504          | 0.014   |
| Winter | Copepod 3 | 73  | Calanoida                                | 0.3486          | 0.012   |
| Winter | Copepod 3 | 58  | <i>Flaccisagitta enflata</i>             | 0.3394          | 0.021   |
| Winter | Mollusca  | 144 | <i>Paracalanus</i> sp. (Two at 100% (v)) | 0.3380          | 0.033   |
| Winter | Copepod 2 | 32  | <i>Paracalanus</i> sp.                   | 0.3373          | 0.014   |
| Winter | Mollusca  | 79  | <i>Calocalanus pavo</i> (v)              | 0.3364          | 0.013   |
| Winter | Copepod 3 | 107 | Calanoida                                | 0.3346          | 0.006   |
| Winter | Cnidaria  | 12  | <i>Bassia bassensis</i>                  | 0.3283          | 0.008   |
| Winter | Copepod 2 | 7   | <i>Delibus</i> sp.                       | 0.3283          | 0.043   |
| Winter | Copepod 3 | 37  | <i>Undinula vulgaris</i> (v)             | 0.3267          | 0.024   |

| Season | Assay     | OTU | Taxa                                     | Indicator value | p value |
|--------|-----------|-----|------------------------------------------|-----------------|---------|
| Winter | Copepod 2 | 35  | Paracalanidae                            | 0.3267          | 0.026   |
| Winter | Mollusca  | 110 | Animalia                                 | 0.3251          | 0.025   |
| Winter | Copepod 3 | 14  | <i>Cosmocalanus darwinii</i>             | 0.3223          | 0.047   |
| Winter | Copepod 2 | 16  | <i>Clausocalanus minor</i>               | 0.3221          | 0.048   |
| Winter | Mollusca  | 116 | Arthropoda                               | 0.3209          | 0.008   |
| Winter | Copepod 3 | 85  | <i>Canthocalanus pauper</i>              | 0.3205          | 0.029   |
| Winter | Cnidaria  | 45  | Animalia                                 | 0.3183          | 0.022   |
| Winter | Copepod 3 | 200 | Arthropoda                               | 0.3176          | 0.007   |
| Winter | Copepod 3 | 215 | <i>Euchaeta concinna</i> (v)             | 0.3176          | 0.007   |
| Winter | Copepod 3 | 52  | <i>Eucalanus pseudattenuatus</i> (v)     | 0.3168          | 0.030   |
| Winter | Copepod 3 | 274 | <i>Subeucalanus pileatus</i> (v)         | 0.3157          | 0.007   |
| Winter | Copepod 2 | 95  | <i>Scolecithricella longispinosa</i> (v) | 0.3099          | 0.006   |
| Winter | Copepod 3 | 64  | <i>Sagitta</i> sp.                       | 0.3074          | 0.040   |
| Winter | Copepod 3 | 78  | <i>Flaccisagitta enflata</i>             | 0.3074          | 0.048   |
| Winter | Copepod 3 | 79  | <i>Scolecithrix danae</i> (v)            | 0.3070          | 0.034   |
| Winter | Mollusca  | 220 | Calanoida (Two at 98% (v))               | 0.3062          | 0.024   |
| Winter | Copepod 1 | 69  | <i>Paracalanus</i> sp.                   | 0.3062          | 0.024   |
| Winter | Copepod 3 | 145 | Arthropoda                               | 0.3011          | 0.046   |
| Winter | Copepod 3 | 50  | <i>Paracalanus aculeatus</i>             | 0.3011          | 0.048   |
| Winter | Cnidaria  | 96  | Animalia                                 | 0.2995          | 0.045   |
| Winter | Copepod 1 | 12  | Arthropoda                               | 0.2953          | 0.048   |
| Winter | Cnidaria  | 112 | <i>Pontellina plumata</i> (v)            | 0.2928          | 0.007   |
| Winter | Mollusca  | 51  | <i>Lucicutia flavicornis</i> (v)         | 0.2923          | 0.039   |
| Winter | Mollusca  | 50  | Hexanauplia                              | 0.2913          | 0.028   |
| Winter | Copepod 3 | 111 | <i>Lucifer intermedius</i>               | 0.2893          | 0.015   |
| Winter | Copepod 3 | 189 | <i>Sagitta</i> sp.                       | 0.2888          | 0.018   |
| Winter | Copepod 3 | 217 | Arthropoda                               | 0.2778          | 0.009   |
| Winter | Copepod 2 | 53  | Calanoida                                | 0.2778          | 0.009   |
| Winter | Copepod 2 | 84  | Palaeonemertea                           | 0.2778          | 0.010   |
| Winter | Copepod 3 | 101 | <i>Cosmocalanus</i> sp.                  | 0.2756          | 0.026   |
| Winter | Copepod 3 | 244 | Arthropoda                               | 0.2725          | 0.018   |
| Winter | Copepod 3 | 282 | Annelida                                 | 0.2708          | 0.011   |
| Winter | Mollusca  | 17  | <i>Lucifer</i> sp. (v)                   | 0.2686          | 0.020   |
| Winter | Mollusca  | 132 | Animalia                                 | 0.2678          | 0.033   |
| Winter | Crustacea | 31  | Animalia                                 | 0.2657          | 0.023   |
| Winter | Mollusca  | 171 | Animalia                                 | 0.2657          | 0.046   |
| Winter | Copepod 3 | 208 | Arthropoda                               | 0.2586          | 0.023   |
| Winter | Copepod 3 | 196 | <i>Flaccisagitta enflata</i>             | 0.2574          | 0.045   |
| Winter | Copepod 1 | 76  | <i>Calocalanus pavo</i> (v)              | 0.2574          | 0.047   |
| Winter | Copepod 1 | 32  | Animalia                                 | 0.2500          | 0.003   |
| Winter | Copepod 3 | 113 | Valvatida                                | 0.2500          | 0.006   |
| Winter | Crust 16S | 125 | Animalia                                 | 0.2500          | 0.006   |
| Winter | Copepod 3 | 65  | Arthropoda                               | 0.2500          | 0.012   |
| Winter | Copepod 2 | 31  | Hexanauplia                              | 0.2481          | 0.047   |
| Winter | Copepod 1 | 148 | Calanoida                                | 0.2397          | 0.035   |
| Winter | Crustacea | 111 | Malacostraca                             | 0.2381          | 0.017   |
| Winter | Copepod 1 | 28  | Calanidae                                | 0.2327          | 0.049   |
| Winter | Cnidaria  | 89  | Asteroidea                               | 0.2126          | 0.040   |
| Winter | Mollusca  | 321 | Arthropoda                               | 0.1912          | 0.037   |

| Season | Assay     | OTU | Taxa               | Indicator value | <i>p</i> value |
|--------|-----------|-----|--------------------|-----------------|----------------|
| Winter | Copepod 3 | 261 | Anthoathecata      | 0.1912          | 0.039          |
| Winter | Cnidaria  | 148 | <i>Sagitta sp.</i> | 0.1912          | 0.049          |
| Winter | Crustacea | 60  | Arthropoda         | 0.1667          | 0.036          |
| Winter | Copepod 3 | 182 | Ophiurida          | 0.1667          | 0.044          |
| Winter | Cnidaria  | 238 | Cidaridae          | 0.1667          | 0.045          |
| Winter | Copepod 2 | 72  | Animalia           | 0.1667          | 0.049          |
| Winter | Copepod 1 | 154 | <i>Arthropoda</i>  | 0.1667          | 0.050          |

(v) Matched to vouchered specimen sequence
