# Supplementary material for: Marine environmental DNA biomonitoring reveals seasonal patterns in biodiversity and identifies ecosystem responses to anomalous climatic events
Source: PubMed Central journal article supplement (PMC6368286; doi:10.1371/journal.pgen.1007943), 2019-02-08
Supplement: pgen.1007943.s010.pdf [file pgen.1007943.s010.pdf]

**Table S10:** Pairwise analysis of yearly OTU richness & assemblage, t statistics included for significant results (t)—PERMANOVA+[7].

| Assay     | OTU diversity test | 2010 2011 | 2010 2012     | 2010 2013     | 2010 2014      | 2011 2012    | 2011 2013    | 2011 2014     | 2012 2013 | 2012 2014 | 2013 2014 |
|-----------|--------------------|-----------|---------------|---------------|----------------|--------------|--------------|---------------|-----------|-----------|-----------|
| Cnidaria  | Richness           | -         | -             | -             | -              | -            | -            | -             | -         | -         | -         |
|           | Assemblage         | -         | *** HB t=1.63 | *** HB t=1.81 | *** HB t=2.01  | * t=1.33     | ** HB t=1.49 | ** HB t=1.51  | -         | -         | -         |
| Copepod 1 | Richness           | -         | * t=2.89      | -             | * t=2.99       | ** HB t=3.81 | * t=2.67     | *** HB t=4.10 | -         | -         | -         |
|           | Assemblage         | * t=1.38  | *** HB t=1.96 | *** HB t=1.85 | *** HB t=2.33  | ** HB t=1.73 | ** HB t=1.57 | *** HB t=2.07 | -         | * t=1.28  | * t=1.32  |
| Copepod 2 | Richness           | -         | * t=2.73      | -             | -              | -            | -            | -             | -         | -         | -         |
|           | Assemblage         | * t=1.37  | ** t=1.51     | -             | -              | * t=1.45     | -            | * t=1.37      | -         | * t=1.34  | -         |
| Copepod 3 | Richness           | * t=2.50  | ** HB t= 3.61 | ** t=3.04     | * t=2.29       | * t=2.23     | -            | -             | -         | -         | -         |
|           | Assemblage         | * t=1.32  | ** HB t=1.71  | ** HB t=1.48  | * t=1.40       | ** t=1.49    | * t=1.37     | * t=1.47      | -         | -         | -         |
| Crustacea | Richness           | * t=2.58  | * t= 2.14     | -             | -              | -            | -            | -             | -         | -         | -         |
|           | Assemblage         | -         | -             | -             | -              | -            | -            | -             | -         | ** t=1.45 | -         |
| Fish      | Richness           | -         | -             | -             | -              | -            | -            | -             | -         | -         | -         |
|           | Assemblage         | -         | -             | -             | -              | -            | -            | -             | -         | -         | -         |
| Mollusca  | Richness           | -         | -             | -             | -              | -            | -            | -             | -         | -         | -         |
|           | Assemblage         | * t=1.30  | *** HB t=1.73 | *** HB t=1.57 | ** HB t=1.65   | ** HB t=1.48 | ** HB t=1.43 | ** HB t=1.56  | -         | -         | -         |
| Universal | Richness           | -         | -             | -             | -              | -            | -            | -             | -         | -         | -         |
|           | Assemblage         | -         | * t=1.34      | ** HB t=1.46  | *** HB t= 1.67 | -            | -            | ** t=1.86     | -         | -         | -         |

Where \*\*\* is  $p \leq .001$ , \*\* is  $p \leq .01$ , \* is  $p \leq .05$ , <sup>HB</sup> is significant with Holm-Bonferroni correction & - is no significant changes
