# Supplementary material for: Marine environmental DNA biomonitoring reveals seasonal patterns in biodiversity and identifies ecosystem responses to anomalous climatic events
Source: PubMed Central journal article supplement (PMC6368286; doi:10.1371/journal.pgen.1007943), 2019-02-08
Supplement: pgen.1007943.s011.pdf [file pgen.1007943.s011.pdf]

**Table S11:** Indicator species analysis for yearly variation —*Indval* [8]

| Year | Assay     | OTU | Taxa                         | Indicator value | $\rho$ value |
|------|-----------|-----|------------------------------|-----------------|--------------|
| 2010 | Cnidaria  | 165 | Pythiales                    | 0.6667          | 0.001        |
| 2010 | Cnidaria  | 175 | Animalia                     | 0.4540          | 0.001        |
| 2010 | Mollusca  | 216 | Arthropoda                   | 0.4444          | 0.001        |
| 2010 | Copepod 2 | 11  | Arthropoda                   | 0.4444          | 0.001        |
| 2010 | Copepod 1 | 57  | Arthropoda                   | 0.4123          | 0.001        |
| 2010 | Mollusca  | 36  | <i>Creseis sp.</i>           | 0.4085          | 0.002        |
| 2010 | Mollusca  | 333 | <i>Oncaea venusta typica</i> | 0.3612          | 0.008        |
| 2010 | Mollusca  | 137 | Calanoida                    | 0.3341          | 0.004        |
| 2010 | Crustacea | 24  | Xanthidae                    | 0.3333          | 0.003        |
| 2010 | Cnidaria  | 21  | Hydrozoa                     | 0.3325          | 0.012        |
| 2010 | Copepod 1 | 74  | <i>Paracalanus Indicus</i>   | 0.3320          | 0.014        |
| 2010 | Mollusca  | 118 | Drepanophoridae              | 0.3099          | 0.027        |
| 2010 | Cnidaria  | 95  | Oithonidae                   | 0.3045          | 0.016        |
| 2010 | Cnidaria  | 54  | <i>Acartia negligens</i>     | 0.2941          | 0.035        |
| 2010 | Cnidaria  | 24  | <i>Aglaura hemistoma</i>     | 0.2911          | 0.022        |
| 2010 | Cnidaria  | 22  | <i>Penilia avirostris</i>    | 0.2910          | 0.050        |
| 2010 | Cnidaria  | 72  | Thalassiosirales             | 0.2736          | 0.030        |
| 2010 | Fish      | 9   | Perciformes                  | 0.2500          | 0.023        |
| 2010 | Copepod 3 | 285 | Calanoida                    | 0.2222          | 0.026        |
| 2010 | Copepod 3 | 280 | Hexanauplia                  | 0.2222          | 0.031        |
| 2010 | Mollusca  | 252 | Polychaeta                   | 0.2222          | 0.032        |
| 2010 | Copepod 1 | 110 | Gastropoda                   | 0.2222          | 0.032        |
| 2010 | Copepod 1 | 133 | Gastropoda                   | 0.2222          | 0.032        |
| 2010 | Universal | 78  | <i>Centropages sp.</i>       | 0.2222          | 0.036        |
| 2011 | Mollusca  | 17  | <i>Lucifer sp.</i>           | 0.4760          | 0.002        |
| 2011 | Copepod 3 | 111 | <i>Lucifer intermedius</i>   | 0.3969          | 0.002        |
| 2011 | Crustacea | 31  | Animalia                     | 0.3645          | 0.004        |
| 2011 | Cnidaria  | 105 | Hydrozoa                     | 0.3636          | 0.010        |
| 2011 | Mollusca  | 280 | <i>Undinula vulgaris</i>     | 0.3240          | 0.005        |
| 2011 | Universal | 18  | Decapoda                     | 0.2978          | 0.018        |
| 2011 | Cnidaria  | 45  | Animalia                     | 0.2968          | 0.026        |
| 2011 | Copepod 2 | 107 | Mollusca                     | 0.2909          | 0.016        |
| 2011 | Crustacea | 26  | <i>Thalamita admete</i>      | 0.2852          | 0.012        |
| 2011 | Universal | 33  | Heterobranchia               | 0.2727          | 0.025        |
| 2011 | Copepod 3 | 271 | Sagittoidea                  | 0.2727          | 0.029        |
| 2011 | Cnidaria  | 125 | Plantae                      | 0.2680          | 0.045        |
| 2011 | Universal | 38  | Palaemonoidea                | 0.2630          | 0.032        |
| 2011 | Universal | 71  | <i>Temora sp.</i>            | 0.2625          | 0.050        |
| 2011 | Copepod 3 | 85  | <i>Canthocalanus pauper</i>  | 0.2583          | 0.045        |
| 2011 | Cnidaria  | 98  | Animalia                     | 0.2528          | 0.049        |
| 2011 | Universal | 61  | Syndiniales                  | 0.2424          | 0.024        |
| 2011 | Copepod 3 | 300 | <i>Clausocalanus sp.</i>     | 0.2385          | 0.039        |
| 2011 | Universal | 87  | Chromista                    | 0.2385          | 0.044        |
| 2011 | Mollusca  | 8   | <i>Candacia bradyi</i>       | 0.2286          | 0.007        |
| 2011 | Mollusca  | 14  | <i>Delibus sp.</i>           | 0.2234          | 0.014        |
| 2012 | Mollusca  | 99  | Arthropoda                   | 0.4069          | 0.001        |
| 2012 | Copepod 3 | 49  | <i>Lucifer intermedius</i>   | 0.4040          | 0.001        |

| Year | Assay     | OTU | Taxa                            | Indicator value | p value |
|------|-----------|-----|---------------------------------|-----------------|---------|
| 2012 | Copepod 2 | 71  | Calanoida                       | 0.3997          | 0.001   |
| 2012 | Copepod 3 | 154 | <i>Paracalanus sp.</i>          | 0.3707          | 0.006   |
| 2012 | Mollusca  | 75  | Arthropoda                      | 0.3378          | 0.003   |
| 2012 | Copepod 3 | 181 | Mollusca                        | 0.3349          | 0.007   |
| 2012 | Mollusca  | 96  | Animalia                        | 0.3344          | 0.009   |
| 2012 | Cnidaria  | 16  | Chlorophyta                     | 0.3235          | 0.001   |
| 2012 | Copepod 3 | 158 | <i>Calocalanus sp.</i>          | 0.3228          | 0.006   |
| 2012 | Mollusca  | 192 | Calanoida                       | 0.3223          | 0.011   |
| 2012 | Mollusca  | 4   | Eukaryota                       | 0.3152          | 0.001   |
| 2012 | Copepod 1 | 22  | Paracalanidae                   | 0.3091          | 0.014   |
| 2012 | Mollusca  | 73  | Malacostraca                    | 0.3075          | 0.017   |
| 2012 | Copepod 2 | 61  | Calanoida                       | 0.3046          | 0.022   |
| 2012 | Copepod 3 | 86  | <i>Calocalanus styliremis</i>   | 0.2972          | 0.020   |
| 2012 | Copepod 3 | 89  | Arthropoda                      | 0.2968          | 0.022   |
| 2012 | Copepod 3 | 74  | <i>Lirabuccinum sp.</i>         | 0.2911          | 0.016   |
| 2012 | Mollusca  | 134 | Gastropoda                      | 0.2909          | 0.021   |
| 2012 | Copepod 1 | 36  | Arthropoda                      | 0.2868          | 0.013   |
| 2012 | Crustacea | 102 | Eukaryota                       | 0.2852          | 0.012   |
| 2012 | Copepod 3 | 202 | Arthropoda                      | 0.2847          | 0.038   |
| 2012 | Copepod 1 | 81  | Arthropoda                      | 0.2840          | 0.016   |
| 2012 | Copepod 1 | 4   | <i>Oncaea waldemari</i>         | 0.2758          | 0.026   |
| 2012 | Copepod 3 | 301 | Potamididae                     | 0.2731          | 0.022   |
| 2012 | Copepod 3 | 321 | Arthropoda                      | 0.2727          | 0.030   |
| 2012 | Copepod 3 | 20  | Arthropoda                      | 0.2727          | 0.032   |
| 2012 | Copepod 3 | 237 | <i>Paracalanus nanus</i>        | 0.2683          | 0.018   |
| 2012 | Cnidaria  | 228 | Animalia                        | 0.2676          | 0.050   |
| 2012 | Copepod 3 | 33  | Calanoida                       | 0.2653          | 0.001   |
| 2012 | Copepod 3 | 63  | <i>Ditrichocorycaeus sp.</i>    | 0.2565          | 0.018   |
| 2012 | Copepod 2 | 49  | <i>Paracalanus sp.</i>          | 0.2562          | 0.038   |
| 2012 | Copepod 2 | 98  | Mollusca                        | 0.2525          | 0.025   |
| 2012 | Crustacea | 97  | Animalia                        | 0.2438          | 0.019   |
| 2012 | Copepod 3 | 250 | Calanoida                       | 0.2424          | 0.028   |
| 2012 | Copepod 1 | 68  | Arthropoda                      | 0.2424          | 0.032   |
| 2012 | Copepod 3 | 293 | Bivalvia                        | 0.2385          | 0.041   |
| 2012 | Copepod 3 | 332 | <i>Paracalanus sp.</i>          | 0.2285          | 0.050   |
| 2013 | Cnidaria  | 5   | Prasinophyceae                  | 0.4231          | 0.001   |
| 2013 | Copepod 1 | 56  | Arthropoda                      | 0.4000          | 0.003   |
| 2013 | Copepod 1 | 19  | Arthropoda                      | 0.3143          | 0.013   |
| 2013 | Mollusca  | 259 | Annelida                        | 0.3088          | 0.007   |
| 2013 | Mollusca  | 63  | Mollusca                        | 0.3046          | 0.023   |
| 2013 | Universal | 13  | Chlorophyta                     | 0.3037          | 0.002   |
| 2013 | Cnidaria  | 154 | Gastropoda                      | 0.3000          | 0.012   |
| 2013 | Cnidaria  | 38  | Leptothecata                    | 0.3000          | 0.013   |
| 2013 | Cnidaria  | 131 | Animalia                        | 0.3000          | 0.014   |
| 2013 | Cnidaria  | 30  | <i>Temnopleurus michaelsoni</i> | 0.2969          | 0.031   |
| 2013 | Copepod 3 | 25  | <i>Labidocera minuta</i>        | 0.2903          | 0.016   |
| 2013 | Copepod 2 | 1   | Mollusca                        | 0.2886          | 0.029   |
| 2013 | Mollusca  | 30  | <i>Cacozeliana granarium</i>    | 0.2843          | 0.045   |
| 2013 | Copepod 3 | 43  | Paracalanidae                   | 0.2829          | 0.035   |

| Year | Assay     | OTU | Taxa                           | Indicator value | <i>p</i> value |
|------|-----------|-----|--------------------------------|-----------------|----------------|
| 2013 | Cnidaria  | 50  | <i>Sagitta sp.</i>             | 0.2826          | 0.035          |
| 2013 | Cnidaria  | 199 | Nudibranchia                   | 0.2750          | 0.010          |
| 2013 | Mollusca  | 5   | <i>Cliona jullieni</i>         | 0.2750          | 0.020          |
| 2013 | Copepod 3 | 26  | Arthropoda                     | 0.2694          | 0.043          |
| 2013 | Cnidaria  | 99  | Nudibranchia                   | 0.2676          | 0.036          |
| 2013 | Universal | 79  | Sagittidae                     | 0.2672          | 0.031          |
| 2013 | Universal | 41  | Cypridinidae                   | 0.2619          | 0.018          |
| 2013 | Mollusca  | 188 | Pyramimonadophyceae            | 0.2571          | 0.020          |
| 2013 | Cnidaria  | 11  | Hydrozoa                       | 0.2565          | 0.021          |
| 2013 | Copepod 1 | 84  | Arthropoda                     | 0.2538          | 0.039          |
| 2013 | Mollusca  | 309 | Mollusca                       | 0.2378          | 0.031          |
| 2013 | Copepod 1 | 106 | Animalia                       | 0.2302          | 0.039          |
| 2013 | Cnidaria  | 242 | Arthropoda                     | 0.2302          | 0.042          |
| 2014 | Copepod 1 | 44  | <i>Triconia sp.</i>            | 0.4046          | 0.002          |
| 2014 | Copepod 1 | 42  | Arthropoda                     | 0.3610          | 0.002          |
| 2014 | Mollusca  | 64  | <i>Oncaea sp.</i>              | 0.3146          | 0.007          |
| 2014 | Copepod 1 | 54  | Arthropoda                     | 0.3006          | 0.008          |
| 2014 | Cnidaria  | 104 | Chlorophyta                    | 0.2955          | 0.011          |
| 2014 | Copepod 3 | 66  | <i>Ctenocalanus vanus</i>      | 0.2926          | 0.007          |
| 2014 | Copepod 1 | 62  | <i>Oncaea mediterranea</i> (v) | 0.2874          | 0.022          |
| 2014 | Copepod 3 | 217 | Arthropoda                     | 0.2852          | 0.014          |
| 2014 | Copepod 1 | 167 | Arthropoda                     | 0.2852          | 0.018          |
| 2014 | Copepod 3 | 28  | Muricidae                      | 0.2839          | 0.010          |
| 2014 | Copepod 1 | 31  | <i>Ataxocerithium</i>          | 0.2780          | 0.045          |
| 2014 | Mollusca  | 27  | Calanoida                      | 0.2772          | 0.011          |
| 2014 | Crustacea | 132 | Eukaryota                      | 0.2727          | 0.024          |
| 2014 | Crustacea | 20  | Eukaryota                      | 0.2727          | 0.034          |
| 2014 | Copepod 1 | 32  | Animalia                       | 0.2727          | 0.045          |
| 2014 | Copepod 1 | 20  | Arthropoda                     | 0.2725          | 0.029          |
| 2014 | Mollusca  | 178 | <i>Paracalanus nanus</i> (v)   | 0.2686          | 0.044          |
| 2014 | Cnidaria  | 55  | Viridiaeplantae                | 0.2680          | 0.038          |
| 2014 | Cnidaria  | 91  | <i>Chromodoris sp.</i>         | 0.2470          | 0.023          |
| 2014 | Copepod 1 | 21  | Gastropoda                     | 0.2346          | 0.039          |
| 2014 | Copepod 3 | 39  | Calanoida                      | 0.2281          | 0.034          |

(v) Matched to vouchered specimen sequence
