# Supplementary material for: Marine environmental DNA biomonitoring reveals seasonal patterns in biodiversity and identifies ecosystem responses to anomalous climatic events
Source: PubMed Central journal article supplement (PMC6368286; doi:10.1371/journal.pgen.1007943), 2019-02-08
Supplement: pgen.1007943.s012.pdf [file pgen.1007943.s012.pdf]

**Table S12:** Pairwise analysis of the OTU richness & assemblage between before, during and after the heatwaves, t statistics included for significant results (t)—PERMANOVA+[7].

| Assay     | OTU diversity test | Heatwave 1 (5 Months) |               |              | Heatwave 2 (17 Months) |               |               |
|-----------|--------------------|-----------------------|---------------|--------------|------------------------|---------------|---------------|
|           |                    | Before-During         | Before-After  | During-After | Before-During          | Before-After  | During-After  |
| Cnidaria  | Richness           | -                     | -             | -            | -                      | -             | -             |
|           | Assemblage         | * HB t=1.27           | *** HB t=1.93 | ** HB t=1.46 | * HB t=1.37            | *** HB t=2.12 | ** HB t=1.48  |
| Copepod 1 | Richness           | -                     | * HB t=2.46   | ** HB t=2.88 | -                      | * HB t=2.71   | -             |
|           | Assemblage         | -                     | *** HB t=2.19 | * t=1.55     | ** HB t=1.48           | *** HB t=2.39 | *** HB t=1.75 |
| Copepod 2 | Richness           | -                     | -             | -            | -                      | -             | -             |
|           | Assemblage         | -                     | -             | -            | -                      | -             | * HB t=1.56   |
| Copepod 3 | Richness           | -                     | ** HB t=2.84  | -            | ** HB t=3.19           | * t=2.34      | -             |
|           | Assemblage         | -                     | ** HB t=1.58  | -            | ** HB t=1.55           | * HB t=1.48   | * HB t=1.51   |
| Crustacea | Richness           | * t=2.32              | -             | -            | ** HB t=2.95           | -             | -             |
|           | Assemblage         | -                     | -             | -            | -                      | -             | -             |
| Fish      | Richness           | -                     | -             | -            | -                      | -             | -             |
|           | Assemblage         | -                     | -             | * HB t=1.44  | -                      | -             | -             |
| Mollusca  | Richness           | -                     | -             | -            | -                      | -             | -             |
|           | Assemblage         | -                     | ** HB t=1.64  | ** HB t=1.54 | ** HB t=1.43           | ** HB t=1.62  | ** HB t=1.47  |
| Universal | Richness           | -                     | -             | -            | -                      | -             | -             |
|           | Assemblage         | -                     | ** HB t=1.59  | * t=1.41     | -                      | ** HB t=1.68  | ** HB t=1.64  |

Where \*\*\* is  $p \leq .001$ , \*\* is  $p \leq .01$ , \* is  $p \leq .05$ , <sup>HB</sup> is significant with Holm-Bonferroni correction & - is no significant change
