# Supplementary material for: Marine environmental DNA biomonitoring reveals seasonal patterns in biodiversity and identifies ecosystem responses to anomalous climatic events
Source: PubMed Central journal article supplement (PMC6368286; doi:10.1371/journal.pgen.1007943), 2019-02-08
Supplement: pgen.1007943.s013.pdf [file pgen.1007943.s013.pdf]

**Table S13:** Indicator species analysis for five-month heatwave variation—*Indval* [8].

| Heatwave | Assay     | OTU | Taxa                                    | Indicator value | $\rho$ value |
|----------|-----------|-----|-----------------------------------------|-----------------|--------------|
| Before   | Cnidaria  | 165 | Pythiales                               | 0.7778          | 0.001        |
| Before   | Copepod 1 | 74  | <i>Paracalanus Indicus</i>              | 0.6061          | 0.002        |
| Before   | Copepod 2 | 14  | Calanoida                               | 0.4972          | 0.023        |
| Before   | Copepod 1 | 57  | Arthropoda                              | 0.4855          | 0.018        |
| Before   | Copepod 1 | 13  | Paracalanidae                           | 0.4638          | 0.015        |
| Before   | Universal | 23  | Alveolata                               | 0.4628          | 0.030        |
| Before   | Cnidaria  | 87  | Chlorophyta                             | 0.4098          | 0.047        |
| Before   | Cnidaria  | 21  | Hydrozoa                                | 0.3984          | 0.030        |
| Before   | Copepod 1 | 114 | Arthropoda                              | 0.3644          | 0.031        |
| Before   | Copepod 2 | 11  | Arthropoda                              | 0.3065          | 0.036        |
| Before   | Mollusca  | 216 | Arthropoda                              | 0.3065          | 0.037        |
| Before   | Cnidaria  | 168 | Plantae                                 | 0.2908          | 0.049        |
| Before   | Copepod 3 | 285 | Calanoida                               | 0.2222          | 0.033        |
| Before   | Copepod 1 | 110 | Gastropoda                              | 0.2222          | 0.033        |
| Before   | Copepod 1 | 133 | Gastropoda                              | 0.2222          | 0.035        |
| Before   | Mollusca  | 252 | Polychaeta                              | 0.2222          | 0.037        |
| During   | Mollusca  | 179 | Hexanauplia                             | 0.6502          | 0.001        |
| During   | Copepod 3 | 41  | Actinopterygii                          | 0.6052          | 0.004        |
| During   | Mollusca  | 201 | <i>Euchaeta longicornis</i>             | 0.5715          | 0.002        |
| During   | Cnidaria  | 125 | Plantae                                 | 0.5426          | 0.007        |
| During   | Copepod 3 | 95  | Arthropoda                              | 0.5426          | 0.010        |
| During   | Fish      | 5   | <i>Parapriacanthus elongatus</i>        | 0.5256          | 0.017        |
| During   | Mollusca  | 242 | <i>Euphausia hemigibba</i>              | 0.5063          | 0.004        |
| During   | Universal | 71  | <i>Temora sp.</i>                       | 0.5055          | 0.011        |
| During   | Mollusca  | 87  | <i>Copilia mirabilis (v)</i>            | 0.4980          | 0.019        |
| During   | Cnidaria  | 160 | Arthropoda                              | 0.4959          | 0.018        |
| During   | Mollusca  | 37  | <i>Turritopsis sp. (Two - 98%)</i>      | 0.4867          | 0.019        |
| During   | Mollusca  | 57  | Arthropoda                              | 0.4862          | 0.026        |
| During   | Copepod 3 | 130 | <i>Subeucalanus sp. (Two - 100%(v))</i> | 0.4827          | 0.024        |
| During   | Copepod 3 | 22  | <i>Calcinus dapsiles</i>                | 0.4779          | 0.025        |
| During   | Mollusca  | 145 | <i>Euphasia recurva (v)</i>             | 0.4684          | 0.011        |
| During   | Mollusca  | 280 | <i>Undinula vulgaris</i>                | 0.4671          | 0.009        |
| During   | Cnidaria  | 158 | Corycaeidae                             | 0.4647          | 0.025        |
| During   | Cnidaria  | 11  | Hydrozoa                                | 0.4624          | 0.011        |
| During   | Cnidaria  | 44  | Malacostraca                            | 0.4566          | 0.041        |
| During   | Mollusca  | 76  | <i>Subeucalanus sp. (two - 99%)</i>     | 0.4488          | 0.033        |
| During   | Cnidaria  | 10  | Animalia                                | 0.4413          | 0.049        |
| During   | Mollusca  | 267 | Malacostraca                            | 0.4321          | 0.029        |
| During   | Copepod 3 | 106 | Arthropoda                              | 0.4201          | 0.050        |
| During   | Crustacea | 88  | Animalia                                | 0.4198          | 0.025        |
| During   | Mollusca  | 186 | Eukaryota                               | 0.4000          | 0.005        |
| During   | Mollusca  | 197 | Gastropoda                              | 0.4000          | 0.008        |
| During   | Mollusca  | 307 | Eukaryota                               | 0.4000          | 0.008        |
| During   | Mollusca  | 7   | Parazoanthidae (Many - 99%)             | 0.4000          | 0.008        |
| During   | Mollusca  | 224 | Gastropoda                              | 0.4000          | 0.010        |
| During   | Mollusca  | 209 | Arthropoda                              | 0.4000          | 0.010        |
| During   | Mollusca  | 80  | Aglajidae                               | 0.4000          | 0.011        |

| Heatwave | Assay     | OTU | Taxa                                 | Indicator value | p value |
|----------|-----------|-----|--------------------------------------|-----------------|---------|
| During   | Copepod 3 | 91  | <i>Euphausia recurva</i> (v)         | 0.3813          | 0.040   |
| During   | Universal | 33  | Heterobranchia                       | 0.3770          | 0.013   |
| During   | Mollusca  | 15  | <i>Watersipora subovoidea</i>        | 0.3770          | 0.013   |
| During   | Cnidaria  | 203 | Animalia                             | 0.3770          | 0.014   |
| During   | Mollusca  | 278 | Calanoida                            | 0.3770          | 0.014   |
| During   | Cnidaria  | 128 | <i>Subeucalanus mucronatus</i> (v)   | 0.3770          | 0.016   |
| During   | Copepod 3 | 126 | <i>Stylocheiron</i> sp.              | 0.3770          | 0.018   |
| During   | Mollusca  | 152 | <i>Subeucalanus mucronatus</i> (v)   | 0.3770          | 0.021   |
| During   | Cnidaria  | 81  | Echinodermata                        | 0.3717          | 0.050   |
| During   | Copepod 3 | 246 | Calanoida                            | 0.3565          | 0.020   |
| During   | Cnidaria  | 201 | Eukaryota                            | 0.3565          | 0.022   |
| During   | Cnidaria  | 73  | Unknown                              | 0.3565          | 0.037   |
| During   | Cnidaria  | 105 | Hydrozoa                             | 0.3565          | 0.037   |
| During   | Copepod 2 | 107 | Mollusca                             | 0.3381          | 0.027   |
| During   | Mollusca  | 211 | Arthropoda                           | 0.3381          | 0.029   |
| During   | Mollusca  | 108 | Annelida                             | 0.3381          | 0.037   |
| During   | Crustacea | 13  | Animalia                             | 0.3381          | 0.038   |
| During   | Cnidaria  | 46  | <i>Pleurobranchus hilli</i>          | 0.3381          | 0.040   |
| During   | Mollusca  | 135 | Caenogastropoda                      | 0.3381          | 0.043   |
| During   | Universal | 59  | <i>Creseis</i> sp.                   | 0.3381          | 0.044   |
| During   | Mollusca  | 5   | <i>Cliona</i> sp.                    | 0.3216          | 0.037   |
| During   | Copepod 1 | 60  | Arthropoda                           | 0.3216          | 0.037   |
| During   | Copepod 3 | 300 | <i>Clausocalanus</i> sp.             | 0.3216          | 0.040   |
| During   | Crustacea | 67  | Eukaryota                            | 0.3216          | 0.047   |
| During   | Universal | 87  | Chromista                            | 0.3216          | 0.050   |
| During   | Copepod 3 | 150 | Arthropoda                           | 0.3130          | 0.019   |
| During   | Mollusca  | 121 | Mollusca                             | 0.3130          | 0.026   |
| During   | Copepod 3 | 264 | <i>Euphausia hemigibba</i>           | 0.2988          | 0.033   |
| During   | Mollusca  | 185 | Gastropoda                           | 0.2988          | 0.048   |
| After    | Mollusca  | 4   | Eukaryota                            | 0.8780          | 0.001   |
| After    | Mollusca  | 64  | <i>Oncaea</i> sp. (Two - 100%)       | 0.7073          | 0.001   |
| After    | Cnidaria  | 16  | Chlorophyta                          | 0.6681          | 0.001   |
| After    | Cnidaria  | 5   | Prasinophyceae                       | 0.6585          | 0.001   |
| After    | Copepod 3 | 28  | Muricidae                            | 0.6352          | 0.001   |
| After    | Copepod 1 | 33  | Gastropoda                           | 0.6341          | 0.002   |
| After    | Copepod 1 | 36  | Arthropoda                           | 0.5746          | 0.002   |
| After    | Copepod 1 | 4   | <i>Oncaea waldemari</i> (v)          | 0.5463          | 0.002   |
| After    | Cnidaria  | 104 | Chlorophyta                          | 0.5158          | 0.018   |
| After    | Universal | 13  | Chlorophyta                          | 0.5131          | 0.002   |
| After    | Mollusca  | 75  | Arthropoda                           | 0.5122          | 0.014   |
| After    | Copepod 3 | 50  | <i>Paracalanus aculeatus</i>         | 0.4920          | 0.016   |
| After    | Copepod 1 | 30  | Neogastropoda                        | 0.4878          | 0.015   |
| After    | Copepod 2 | 25  | <i>Paracalanus</i> sp. (Two at 100%) | 0.4696          | 0.034   |
| After    | Copepod 3 | 89  | Arthropoda                           | 0.4634          | 0.026   |
| After    | Copepod 1 | 44  | Triconia sp.                         | 0.4634          | 0.029   |
| After    | Universal | 14  | Chlorellaceae (Many at 99%)          | 0.4445          | 0.036   |
| After    | Mollusca  | 45  | Animalia                             | 0.4390          | 0.038   |
| After    | Mollusca  | 96  | Animalia                             | 0.4146          | 0.031   |
| After    | Copepod 3 | 107 | Calanoida                            | 0.4146          | 0.032   |

| Heatwave | Assay     | OTU | Taxa       | Indicator value | <i>p</i> value |
|----------|-----------|-----|------------|-----------------|----------------|
| After    | Mollusca  | 128 | Eukaryota  | 0.4146          | 0.034          |
| After    | Cnidaria  | 155 | Eukaryota  | 0.4146          | 0.038          |
| After    | Copepod 3 | 44  | Animalia   | 0.4125          | 0.016          |
| After    | Copepod 3 | 148 | Decapoda   | 0.3902          | 0.033          |
| After    | Copepod 3 | 92  | Gastropoda | 0.3902          | 0.039          |
| After    | Copepod 3 | 138 | Calanoida  | 0.3902          | 0.050          |

(v) Matched to vouchered specimen sequence
