# Supplementary material for: Marine environmental DNA biomonitoring reveals seasonal patterns in biodiversity and identifies ecosystem responses to anomalous climatic events
Source: PubMed Central journal article supplement (PMC6368286; doi:10.1371/journal.pgen.1007943), 2019-02-08
Supplement: pgen.1007943.s014.pdf [file pgen.1007943.s014.pdf]

**Table S14:** Indicator species analysis for 17-month heatwave variation—*Indval* [8].

| Heatwave | Assay     | OTU | Taxa                                    | Indicator value | $\rho$ value |
|----------|-----------|-----|-----------------------------------------|-----------------|--------------|
| Before   | Cnidaria  | 165 | Pythiales                               | 0.7778          | 0.001        |
| Before   | Cnidaria  | 21  | Hydrozoa                                | 0.5234          | 0.001        |
| Before   | Copepod 1 | 74  | <i>Paracalanus Indicus</i>              | 0.4892          | 0.002        |
| Before   | Mollusca  | 36  | <i>Creseis sp.</i>                      | 0.4705          | 0.004        |
| Before   | Universal | 23  | Syndiniales                             | 0.4701          | 0.004        |
| Before   | Cnidaria  | 22  | <i>Penilia avirostris</i>               | 0.4549          | 0.015        |
| Before   | Copepod 1 | 57  | Arthropoda                              | 0.4497          | 0.001        |
| Before   | Cnidaria  | 54  | <i>Acartia negligens</i>                | 0.4460          | 0.016        |
| Before   | Cnidaria  | 87  | Chlorophyta                             | 0.4395          | 0.014        |
| Before   | Cnidaria  | 175 | Animalia                                | 0.4291          | 0.003        |
| Before   | Cnidaria  | 24  | <i>Aglaura hemistoma</i>                | 0.4223          | 0.012        |
| Before   | Copepod 3 | 27  | Clausocalanidae                         | 0.4105          | 0.041        |
| Before   | Mollusca  | 137 | Calanoida                               | 0.4029          | 0.012        |
| Before   | Copepod 2 | 14  | Calanoida                               | 0.3980          | 0.015        |
| Before   | Mollusca  | 216 | Arthropoda                              | 0.3951          | 0.003        |
| Before   | Copepod 2 | 11  | Arthropoda                              | 0.3951          | 0.003        |
| Before   | Cnidaria  | 58  | Arthropoda                              | 0.3836          | 0.017        |
| Before   | Cnidaria  | 41  | <i>Ophiura kinbergi</i>                 | 0.3830          | 0.036        |
| Before   | Cnidaria  | 76  | Chlorophyta                             | 0.3652          | 0.012        |
| Before   | Mollusca  | 333 | <i>Oncaea venusta typica</i>            | 0.3568          | 0.009        |
| Before   | Copepod 1 | 114 | Arthropoda                              | 0.3363          | 0.007        |
| Before   | Copepod 2 | 86  | <i>Ophiura kinbergi</i>                 | 0.3214          | 0.031        |
| Before   | Copepod 2 | 113 | <i>Temora discaudata (v)</i>            | 0.2750          | 0.043        |
| Before   | Cnidaria  | 168 | Plantae                                 | 0.2745          | 0.013        |
| Before   | Copepod 1 | 5   | Mollusca                                | 0.2617          | 0.030        |
| Before   | Mollusca  | 188 | Pyramimonadophyceae                     | 0.2333          | 0.029        |
| Before   | Copepod 1 | 110 | Gastropoda                              | 0.2222          | 0.025        |
| Before   | Mollusca  | 252 | Polychaeta                              | 0.2222          | 0.028        |
| Before   | Copepod 3 | 285 | Calanoida                               | 0.2222          | 0.029        |
| Before   | Copepod 1 | 133 | Gastropoda                              | 0.2222          | 0.036        |
| Before   | Cnidaria  | 127 | Chlorophyta                             | 0.1915          | 0.040        |
| Before   | Cnidaria  | 93  | Leptothecata                            | 0.1915          | 0.042        |
| During   | Copepod 2 | 35  | Paracalanidae                           | 0.4342          | 0.016        |
| During   | Copepod 3 | 35  | Calanoida                               | 0.4264          | 0.008        |
| During   | Copepod 3 | 130 | <i>Subeucalanus sp. (Two - 100%(v))</i> | 0.4043          | 0.019        |
| During   | Copepod 3 | 72  | <i>Candacia truncate (v)</i>            | 0.3988          | 0.006        |
| During   | Copepod 3 | 52  | <i>Eucalanus pseudattenuatus (v)</i>    | 0.3929          | 0.022        |
| During   | Copepod 3 | 83  | <i>Acrocalanus gracilis</i>             | 0.3840          | 0.041        |
| During   | Mollusca  | 280 | <i>Undinula vulgaris</i>                | 0.3829          | 0.010        |
| During   | Copepod 3 | 165 | <i>Clausocalanus jobei (v)</i>          | 0.3713          | 0.040        |
| During   | Crustacea | 31  | Animalia                                | 0.3663          | 0.004        |
| During   | Mollusca  | 17  | <i>Lucifer sp. (v)</i>                  | 0.3663          | 0.008        |
| During   | Copepod 2 | 105 | <i>Acrocalanus gracilis (v)</i>         | 0.3634          | 0.010        |
| During   | Universal | 48  | <i>Subeucalanus pileatus</i>            | 0.3496          | 0.041        |
| During   | Copepod 2 | 107 | Mollusca                                | 0.3381          | 0.029        |
| During   | Copepod 1 | 103 | Clausocalanidae                         | 0.3363          | 0.022        |
| During   | Mollusca  | 115 | <i>Creseis sp.</i>                      | 0.3352          | 0.018        |
| During   | Universal | 71  | <i>Temora sp.</i>                       | 0.3352          | 0.027        |

| Heatwave | Assay     | OTU | Taxa                              | Indicator value | p value |
|----------|-----------|-----|-----------------------------------|-----------------|---------|
| During   | Mollusca  | 148 | Prasinophyceae                    | 0.3349          | 0.038   |
| During   | Copepod 3 | 121 | Sagittidae                        | 0.3245          | 0.050   |
| During   | Copepod 3 | 111 | <i>Lucifer intermedius</i>        | 0.3150          | 0.010   |
| During   | Mollusca  | 215 | Arthropoda                        | 0.3043          | 0.042   |
| During   | Copepod 3 | 95  | Arthropoda                        | 0.3029          | 0.048   |
| During   | Copepod 1 | 122 | <i>Undinula vulgaris</i>          | 0.2844          | 0.029   |
| During   | Crustacea | 13  | Animalia                          | 0.2778          | 0.009   |
| During   | Universal | 87  | Chromista                         | 0.2461          | 0.016   |
| During   | Mollusca  | 65  | Decapoda                          | 0.2461          | 0.026   |
| During   | Universal | 61  | Syndiniales                       | 0.2461          | 0.028   |
| During   | Copepod 3 | 301 | Potamididae                       | 0.2314          | 0.022   |
| During   | Mollusca  | 179 | Hexanauplia                       | 0.2314          | 0.037   |
| During   | Cnidaria  | 105 | Hydrozoa                          | 0.2222          | 0.020   |
| During   | Copepod 2 | 64  | <i>Candacia catula</i>            | 0.2222          | 0.022   |
| During   | Copepod 3 | 119 | Chaetognatha                      | 0.1915          | 0.046   |
| After    | Cnidaria  | 5   | Prasinophyceae                    | 0.7940          | 0.001   |
| After    | Mollusca  | 4   | Eukaryota                         | 0.6350          | 0.001   |
| After    | Cnidaria  | 16  | Chlorophyta                       | 0.6036          | 0.001   |
| After    | Mollusca  | 64  | <i>Oncaea sp. (Two - 100%)</i>    | 0.5843          | 0.001   |
| After    | Copepod 1 | 4   | <i>Oncaea waldemari (v)</i>       | 0.5455          | 0.001   |
| After    | Universal | 13  | Chlorophyta                       | 0.4936          | 0.001   |
| After    | Copepod 1 | 19  | Arthropoda                        | 0.4802          | 0.003   |
| After    | Copepod 3 | 28  | Muricidae                         | 0.4603          | 0.006   |
| After    | Copepod 2 | 29  | <i>Calocalanus styliremis (v)</i> | 0.4474          | 0.015   |
| After    | Cnidaria  | 11  | Hydrozoa                          | 0.4346          | 0.001   |
| After    | Copepod 1 | 36  | Arthropoda                        | 0.4309          | 0.008   |
| After    | Cnidaria  | 36  | Arthropoda                        | 0.4227          | 0.021   |
| After    | Mollusca  | 27  | Calanoida                         | 0.4212          | 0.038   |
| After    | Copepod 1 | 9   | Triconia sp.                      | 0.4208          | 0.025   |
| After    | Copepod 1 | 17  | Arthropoda                        | 0.4133          | 0.020   |
| After    | Cnidaria  | 104 | Chlorophyta                       | 0.4100          | 0.006   |
| After    | Copepod 1 | 20  | Arthropoda                        | 0.4094          | 0.015   |
| After    | Copepod 3 | 148 | Decapoda                          | 0.4091          | 0.010   |
| After    | Copepod 3 | 44  | Animalia                          | 0.4047          | 0.012   |
| After    | Mollusca  | 30  | <i>Cacozeliana granarium</i>      | 0.3971          | 0.044   |
| After    | Copepod 1 | 7   | Arthropoda                        | 0.3945          | 0.026   |
| After    | Copepod 3 | 86  | <i>Calocalanus styliremis</i>     | 0.3821          | 0.042   |
| After    | Copepod 1 | 84  | Arthropoda                        | 0.3746          | 0.014   |
| After    | Copepod 1 | 54  | Arthropoda                        | 0.3701          | 0.044   |
| After    | Copepod 1 | 42  | Arthropoda                        | 0.3609          | 0.013   |
| After    | Copepod 3 | 190 | <i>Calocalanus sp.</i>            | 0.3403          | 0.018   |
| After    | Copepod 1 | 27  | Acartiidae                        | 0.3400          | 0.040   |
| After    | Copepod 1 | 31  | Ataxocerithium                    | 0.3296          | 0.050   |
| After    | Cnidaria  | 155 | Eukaryota                         | 0.3140          | 0.030   |
| After    | Cnidaria  | 25  | Gastropoda                        | 0.3086          | 0.044   |
| After    | Copepod 1 | 47  | Arthropoda                        | 0.2857          | 0.024   |
| After    | Copepod 3 | 315 | Calanoida                         | 0.2724          | 0.035   |
| After    | Mollusca  | 309 | Mollusca                          | 0.2500          | 0.028   |
