# Supplementary material for: Marine environmental DNA biomonitoring reveals seasonal patterns in biodiversity and identifies ecosystem responses to anomalous climatic events
Source: PubMed Central journal article supplement (PMC6368286; doi:10.1371/journal.pgen.1007943), 2019-02-08
Supplement: pgen.1007943.s015.pdf [file pgen.1007943.s015.pdf]

**Table S15:** Alternative linear models for Assemblage and Richness.

| Assay used | OTU diversity test | Most parsimonious model (R <sup>2</sup> ) | Alternative Model 1          | Alternative Model 2                                   | Alternative Model 3                                   | Alternative Model 4                                   | Alternative Model 5                                   |
|------------|--------------------|-------------------------------------------|------------------------------|-------------------------------------------------------|-------------------------------------------------------|-------------------------------------------------------|-------------------------------------------------------|
| Cnidaria   | Assemblage         | SST, Salinity, Silicate (0.162)           | Silicate                     | SST, Silicate                                         | SST, Salinity, Silicate, Phosphate                    | SST, Salinity, Silicate, Nitrate, Phosphate           | SST, Salinity, Silicate, Nitrate, Phosphate, Ammonium |
|            | AIC                | 404.45                                    | 405.92                       | 405.12                                                | 405.02                                                | 405.51                                                | 406.10                                                |
|            | Richness           | SST, Silicate (0.112)                     | Silicate                     | SST, Silicate, Phosphate                              | SST, Silicate, Phosphate, Ammonium                    |                                                       |                                                       |
|            | AIC                | 447.24                                    | 447.30                       | 447.41                                                | 449.05                                                |                                                       |                                                       |
| Copepod 1  | Assemblage         | SST, Salinity, Silicate (0.155)           | Silicate                     | SST, Salinity, Silicate, Nitrate, Phosphate, Ammonium | SST, Salinity, Silicate, Nitrate, Phosphate, Ammonium | SST, Salinity, Silicate, Nitrate, Phosphate, Ammonium |                                                       |
|            | AIC                | 404.62                                    | 405.3                        | 405.02                                                | 405.33                                                | 406.17                                                |                                                       |
|            | Richness           | Salinity (0.067)                          | Salinity, Phosphate          |                                                       |                                                       |                                                       |                                                       |
|            | AIC                | 451.13                                    | 452.61                       |                                                       |                                                       |                                                       |                                                       |
| Copepod 2  | Assemblage         | SST, Salinity, Silicate (0.230)           | Salinity, Silicate           | SST, Salinity, Silicate, Ammonium                     |                                                       |                                                       |                                                       |
|            | AIC                | 382.78                                    | 383.94                       | 383.59                                                |                                                       |                                                       |                                                       |
|            | Richness           | Salinity, Silicate (0.309)                | Salinity, Silicate, Ammonium | Salinity, Silicate, Phosphate, Ammonium               |                                                       |                                                       |                                                       |
|            | AIC                | 427.16                                    | 427.60                       | 429.03                                                |                                                       |                                                       |                                                       |
| Copepod 3  | Assemblage         | SST, Salinity, Silicate (0.227)           | Salinity                     | SST, Salinity                                         | SST, Salinity, Silicate, Ammonium                     | SST, Salinity, Silicate, Phosphate, Ammonium          |                                                       |
|            | AIC                | 383.36                                    | 385.25                       | 383.83                                                | 383.79                                                | 384.49                                                |                                                       |
|            | Richness           | SST, Salinity, Ammonium (0.392)           | SST, Salinity                | SST, Salinity, Phosphate, Ammonium                    |                                                       |                                                       |                                                       |
|            | AIC                | 492.79                                    | 492.90                       | 494.31                                                |                                                       |                                                       |                                                       |
| Crustacea  | Assemblage         | SST, Salinity (0.098)                     | Silicate                     | SST, Salinity, Ammonium                               | SST, Salinity, Silicate, Ammonium                     | SST, Salinity, Silicate, Phosphate, Ammonium          |                                                       |

| Assay used | OTU diversity test | Most parsimonious model (R <sup>2</sup> )      | Alternative Model 1               | Alternative Model 2               | Alternative Model 3                          | Alternative Model 4                                   | Alternative Model 5                                   |
|------------|--------------------|------------------------------------------------|-----------------------------------|-----------------------------------|----------------------------------------------|-------------------------------------------------------|-------------------------------------------------------|
|            | AIC                | 405.52                                         | 405.97                            | 405.89                            | 406.61                                       | 407.39                                                |                                                       |
|            | Richness           | SST, Ammonium (0.183)                          | SST, Salinity, Ammonium           | SST, Salinity, Silicate, Ammonium |                                              |                                                       |                                                       |
|            | AIC                | 376.85                                         | 377.39                            | 377.43                            |                                              |                                                       |                                                       |
| Fish       | Assemblage         | SST, Salinity, Ammonium (0.147)                | Salinity                          | SST, Salinity                     | SST, Salinity, Phosphate, Ammonium           | SST, Salinity, Silicate, Nitrate, Phosphate           | SST, Salinity, Silicate, Nitrate, Phosphate, Ammonium |
|            | AIC                | 427.43                                         | 428.33                            | 427.77                            | 428.07                                       | 428.25                                                | 428.9                                                 |
|            | Richness           | Nitrate, Salinity, Silicate, Phosphate (0.251) | Nitrate, Silicate                 | Nitrate, Salinity, Silicate       | SST, Nitrate, Salinity, Silicate, Phosphate  |                                                       |                                                       |
|            | AIC                | 262.88                                         | 263.95                            | 263.88                            | 264.82                                       |                                                       |                                                       |
| Mollusca   | Assemblage         | SST, Salinity, Silicate (0.197)                | SST, Salinity                     | SST, Salinity, Silicate, Ammonium | SST, Salinity, Silicate, Phosphate, Ammonium | SST, Salinity, Silicate, Nitrate, Phosphate, Ammonium |                                                       |
|            | AIC                | 388.46                                         | 389.22                            | 388.85                            | 389.25                                       | 390.17                                                |                                                       |
|            | Richness           | SST (0.061)                                    | SST, Ammonium                     | SST, Silicate, Ammonium           |                                              |                                                       |                                                       |
|            | AIC                | 499.91                                         | 500.94                            | 501.65                            |                                              |                                                       |                                                       |
| Universal  | Assemblage         | SST, Salinity, Silicate (0.140)                | Salinity                          | Salinity, Silicate                | SST, Salinity, Silicate, Phosphate           | SST, Salinity, Silicate, Phosphate, Ammonium          | SST, Salinity, Silicate, Nitrate, Phosphate, Ammonium |
|            | AIC                | 371.36                                         | 372.12                            | 371.4                             | 370.95                                       | 370.95                                                | 371.89                                                |
|            | Richness           | SST, Salinity, Phosphate (0.212)               | SST, Nitrate, Salinity, Phosphate |                                   |                                              |                                                       |                                                       |
|            | AIC                | 374.71                                         | 376.55                            |                                   |                                              |                                                       |                                                       |
