# Supplementary material for: Marine environmental DNA biomonitoring reveals seasonal patterns in biodiversity and identifies ecosystem responses to anomalous climatic events
Source: PubMed Central journal article supplement (PMC6368286; doi:10.1371/journal.pgen.1007943), 2019-02-08
Supplement: pgen.1007943.s016.pdf [file pgen.1007943.s016.pdf]

**Table S16:** Metabarcoding PCR assays developed and tested for this study.

| PCR assay     | Primer set used                        | Target Taxa | Gene        | Primer sequence                                                | Amplicon length (bp) | Reference        | Assay T <sub>a</sub> (°C) | Mostly detected                           |
|---------------|----------------------------------------|-------------|-------------|----------------------------------------------------------------|----------------------|------------------|---------------------------|-------------------------------------------|
| Copepod 3     | Acartia F<br>Acartia R                 | Calanoida   | COI         | 5' GGRGAYGATCARRTYTATAAYGT 3'<br>5' TTYATWCGWGGAAAHGCIATRTC 3' | ~103                 | This study       | 52                        | Malacostraca, Hexanauplia, Actinopterygii |
| Acrocalanus   | Acrocalanus F<br>Acrocalanus R         | Calanoida   | COI         | 5' CTGTTTAYCCWCCTCTTCTAG 3'<br>5' TCTARTAAATDCCAATACTCGT 3'    | ~111                 | Pilot study      | 50                        | Hexanauplia                               |
| Branchiostoma | Branchiostoma F<br>Branchiostoma R     | Leptocardii | COI         | 5' CRGAYATRGCKTTYCCYCG 3'<br>5' AAAATTGAYGAYACMCCWGC 3'        | ~169                 | Pilot study      | 50                        | Mollusca                                  |
| Calanus       | Calanus F<br>Calanus R                 | Calanoida   | COI         | 5' GCWTCYGTNGAYTYGCWAT 3'<br>5' CCSCCCACATCAYAMAATG 3'         | ~212                 | Pilot study      | 51                        | Very little                               |
| Calocalanus   | Calocalanus F<br>Calocalanus R         | Calanoida   | COI         | 5' CTGGDTCNTRATGGRGATG 3'<br>5' GAHAAAGDGGRTAAACWGTTC 3'       | ~225                 | Pilot study      | 51                        | Hexanauplia                               |
| Candacia      | Candacia F<br>Candacia R               | Calanoida   | COI         | 5' GGVSATSAGTDGACTTTGC 3'<br>5' GCAAANAGAGGYATWCGNTC 3'        | ~97                  | Pilot study      | 51                        | Hexanauplia                               |
| Cnidaria      | Cnidaria F<br>Cnidaria R               | Cnidarians  | COI         | 5' CATGATHITYTCWTDGMTATGCC 3'<br>5' GTYCAWCCWGTWCCWRCYCC 3'    | ~145                 | This study       | 52                        | Cnidaria, Echinodermata                   |
| Copilia       | Copilia F<br>Copilia R                 | Cyclopoida  | COI         | 5' CGCAATCTTCTCTACACC 3'<br>5' GGAATGAGAGGAGAAGTAGG 3'         | ~124                 | Pilot study      | 53                        | <i>Copilia mirabilis</i>                  |
| Creseis       | Creseis F<br>Creseis R                 | Gastropoda  | COI         | 5' CATTCTGACTHCHCCTCCWTC 3'<br>5' GCMCCHAGAATAGAAGAAATACC 3'   | ~136                 | Pilot study      | 53                        | Mollusca                                  |
| Crust 16S     | Crust16S_F(short)<br>Crust16S_R(short) | Crustaceans | 16S<br>rRNA | 5' GGGACGATAAGACCCTATA 3'<br>5' ATTACGCTGTATCCCTAAAG 3'        | ~170                 | Berry et al. [1] | 51                        | Malacostraca                              |
| Cyrtarocyliis | Cyrtarocyliis F<br>Cyrtarocyliis R     | Ciliophora  | 18S<br>rRNA | 5' CGCGTAAATTACCAATCCTG 3'<br>5' CTAACAGAAATCCAACACTACGAGC 3'  | ~169                 | Pilot study      | 56                        | Chromis                                   |
| Doliolum      | Doliolum F<br>Doliolum R               | Thaliacea   | 18S<br>rRNA | 5' GGGATGCGTGCTTTTATC 3'<br>5' CTTGGATGTGGTAGCCG 3'            | ~196                 | Pilot study      | 52                        | Very little                               |
| Eucalanus     | Eucalanus F<br>Eucalanus R             | Calanoida   | COI         | 5' GTAGARAGAGNGCHGGWAC 3'<br>5' GCAGTAATVACKACDGCYCA 3'        | ~184                 | Pilot study      | 52                        | Hexanauplia                               |

| PCR assay   | Primer set used                     | Target Taxa   | Gene        | Primer sequence                                                  | Amplicon length (bp) | Reference                                        | Assay T <sub>a</sub> (°C) | Mostly detected                    |
|-------------|-------------------------------------|---------------|-------------|------------------------------------------------------------------|----------------------|--------------------------------------------------|---------------------------|------------------------------------|
| Fish 16S    | Fish16sF/D<br>16s2R<br>(degenerate) | Fish          | 16S<br>rRNA | 5' GACCCTATGGAGCTTTAGAC 3'<br>5' CGCTGTTATCCCTADRGTAACT 3'       | ~200                 | F- Berry et al.<br>[1]<br>R-Deagle et al.<br>[2] | 54                        | Actinopterygii                     |
| Mollusca    | Limacina F<br>Limacina R            | Mollusca      | COI         | 5' TAATTGGNGGVTGGRAAYTG 3'<br>5' GTTCAHCCTRAYCCTRCNCC 3'         | ~118                 | This study                                       | 52                        | Hexanauplia,<br>Cnidaria, Mollusca |
| Copepod 2   | Lucicutia F<br>Lucicutia R          | Calanoida     | COI         | 5' CCHGAYATAGCTTYCCHCG 3'<br>5' GAAAAAATGCAAATCTACDGATC 3'       | ~134                 | This study                                       | 52                        | Hexanauplia, Mollusca              |
| Lucifer     | Lucifer F<br>Lucifer R              | Decapoda      | COI         | 5' GGAGAYGAYCARATTATAATGTAG 3'<br>5' GAGGRAAWGCYATATCAGGAG 3'    | ~96                  | Pilot study                                      | 51                        | Hexanauplia                        |
| Oithona     | Oithona F<br>Oithona R              | Cyclopoida    | COI         | 5' CCAGATATAGCHTYCCHCG 3'<br>5' GAAGAHACHCCYCYAARTG 3'           | ~163                 | Pilot study                                      | 52                        | Hexanauplia                        |
| Oncaea      | Oncaea F<br>Oncaea R                | Cyclopoida    | COI         | 5' TTGSGKGTYYGGWAATTG 3'<br>5' GCTAARTGAAGWSHAAAAATRG 3'         | ~194                 | Pilot study                                      | 48                        | Hexanauplia                        |
| Paracalanus | Paracalanus F<br>Paracalanus R      | Calanoida     | COI         | 5' CCRITAATAYTAGGAGCAGC 3'<br>5' CTAATAATWGAACWACWCCTGC 3'       | ~187                 | Pilot study                                      | 51                        | Hexanauplia                        |
| Pontellidae | Pontellidae F<br>Pontellidae R      | Calanoida     | COI         | 5' GRGCAGGWACDGGDTGRAC 3'<br>5' CGATCYAAAATTATYCCAAAHACWCG<br>3' | ~133                 | Pilot study                                      | 54                        | Hexanauplia                        |
| S_Ceph 16S  | S_Cephalopoda_F<br>S_Cephalopoda_R  | Cephalopoda   | 16S<br>rRNA | 5' GCTRGAATGAATGGTTTGAC 3'<br>5' TCAWTAGGGTCTTCTCGTCC 3'         | ~70                  | Peters et al.<br>[11]                            | 50                        | Mollusca<br>Crustacea              |
| Copepod 1   | Triconia F<br>Triconia R            | Cyclopoida    | COI         | 5' CAGGVCTTTAYTWGGRGATG 3'<br>5' AAAATCTATATTATTCBCGRGG 3'       | ~131                 | This study                                       | 49                        | Hexanauplia, Mollusca              |
| Urchin      | Urchin F<br>Urchin R                | Echinodermata | 16S<br>rRNA | 5' GACGAGAAGACCCTGDGC 3'<br>5' CGCTGTTATCCCTRCGGTAAC 3'          | ~200-230             | Pilot study                                      | 55                        | Echinodermata                      |
| WSP         | WSP F<br>WSP R                      | Decapoda      | COI         | 5' AGWYTWATTATYCGRGCWGA 3'<br>5' TCARTTWCCAAATCCWCC 3'           | ~107                 | Pilot study                                      | 48                        | Malacostraca                       |

“F” refers to the forward primer; “R” refers to the reverse primer.
