# Supplementary material for: Marine environmental DNA biomonitoring reveals seasonal patterns in biodiversity and identifies ecosystem responses to anomalous climatic events
Source: PubMed Central journal article supplement (PMC6368286; doi:10.1371/journal.pgen.1007943), 2019-02-08
Supplement: pgen.1007943.s019.pdf [file pgen.1007943.s019.pdf]

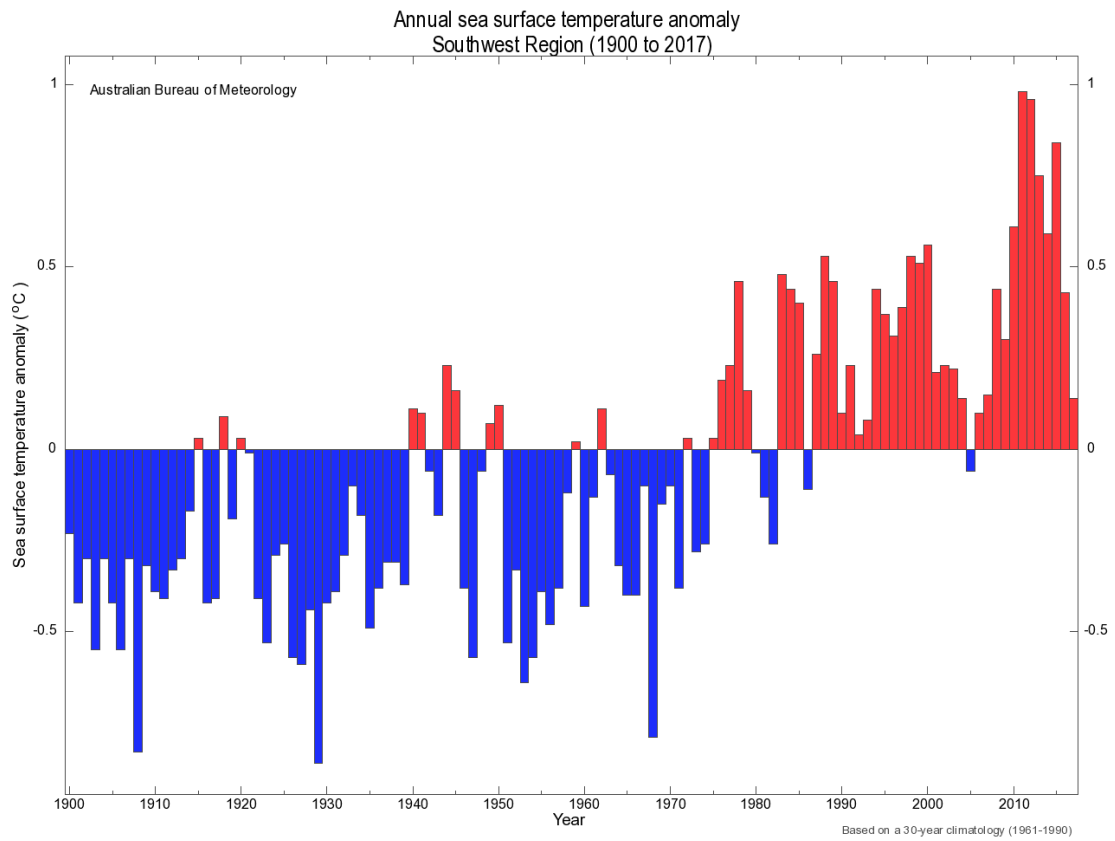

Figure S3: Annual sea surface temperature anomalies from 1900-2017. The 2011 and 2012 heatwave events produce the two highest peaks —Extracted from the Bureau of Meteorology time series graphs [9].
